# Supplementary material for: Photoactivatable metabolic warheads enable precise and safe ablation of target cells in vivo
Source: PubMed Central journal article supplement (PMC8062536; doi:10.1038/s41467-021-22578-2), 2021-04-22
Supplement: 41467_2021_22578_MOESM1_ESM.pdf [file 41467_2021_22578_MOESM1_ESM.pdf]

## **Supplementary Information**

**Photoactivatable metabolic warheads enable precise and safe ablation of target cells in vivo**

### **Table of Contents**

Supplementary Figures

Supplementary Tables

Supplementary Methods

Supplementary References

## Supplementary Figures

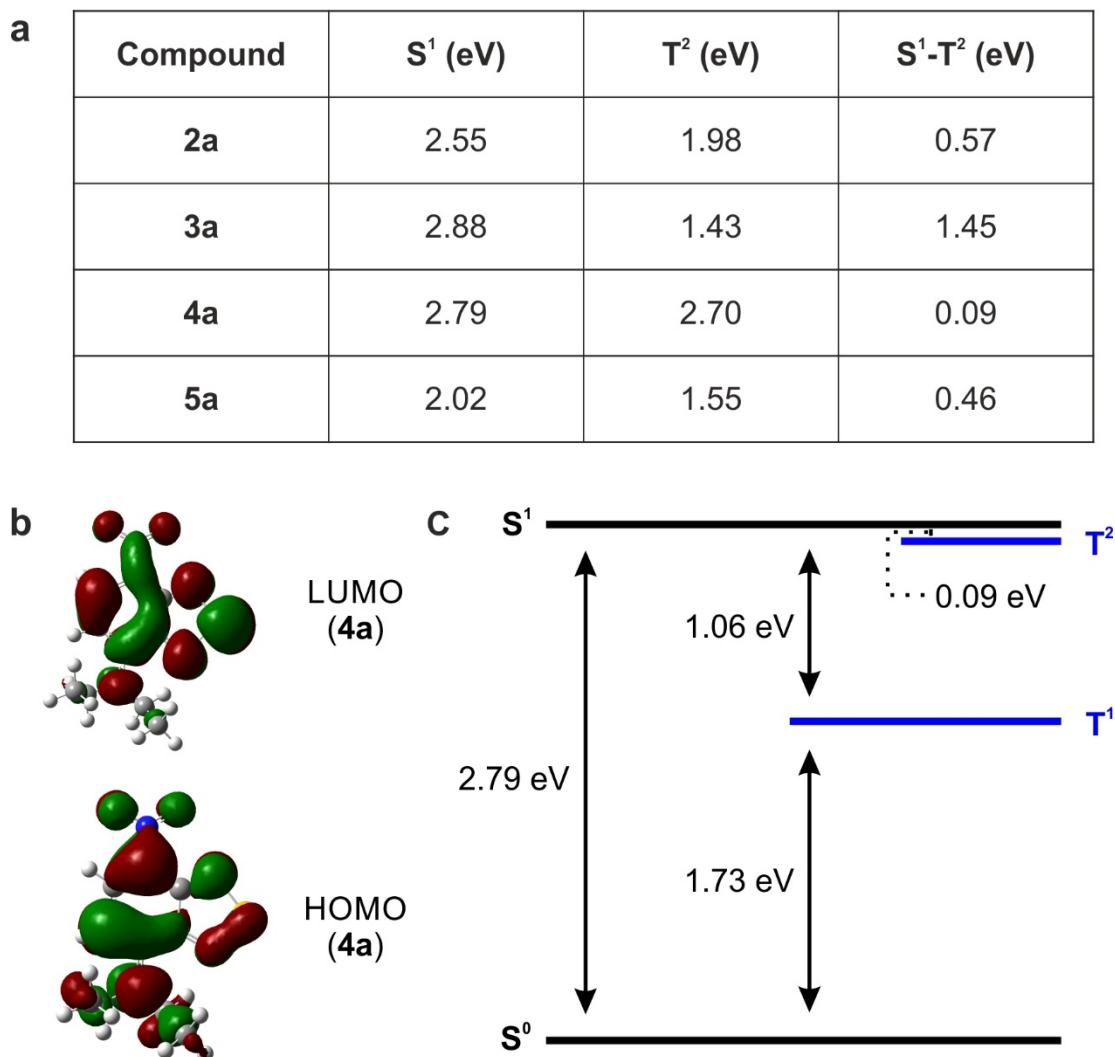

**Supplementary Figure 1. DFT calculations for the benzodiazole scaffolds 2a-5a.** (a) Energy values for both S<sup>1</sup> and T<sup>2</sup> levels and the S<sup>1</sup>-T<sup>2</sup> intra-system crossing transition. Calculations performed using a B3YLP functional and def2tzvp basis set. (b) Molecular orbital diagrams of the HOMO and LUMO electron distributions of compound **4a**. (c) Jablonski diagram of the energy levels of compound **4a**.

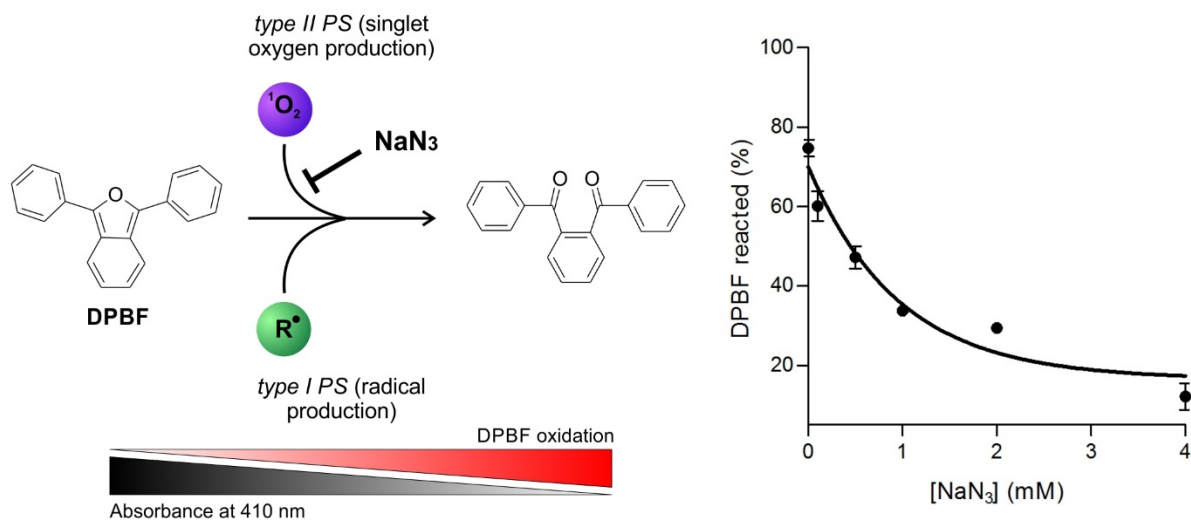

**Supplementary Figure 2. Evaluation of compound 4a as a type I/type II PS.**  $\text{NaN}_3$  reacts selectively with  $^1\text{O}_2$  produced by type II PS preventing the oxidation of 1,3-diphenylisobenzofuran (DPBF), whereas the oxidation of DPBF is not affected in type I PS. DPBF ( $400\ \mu\text{M}$ ) and **4a** ( $50\ \mu\text{M}$ ) were dissolved in EtOH (Note: DPBF was not soluble in water at these concentrations) and illuminated ( $0.35\ \text{mW}$ ,  $520\ \text{nm}$ ,  $1\ \text{h}$ ) in the absence and presence of sodium azide ( $0\text{--}4\ \text{mM}$ ). Ratios of DPBF oxidation were determined by normalization against absorbance at  $410\ \text{nm}$  in the absence of illumination. Data presented as mean values  $\pm$  SEM ( $n=4$  independent experiments).

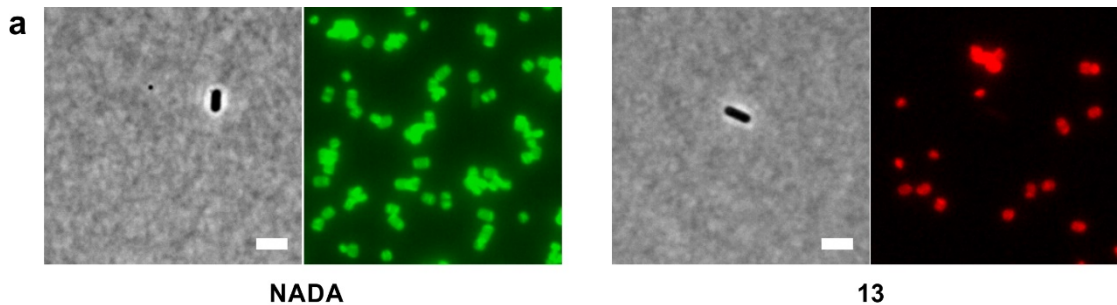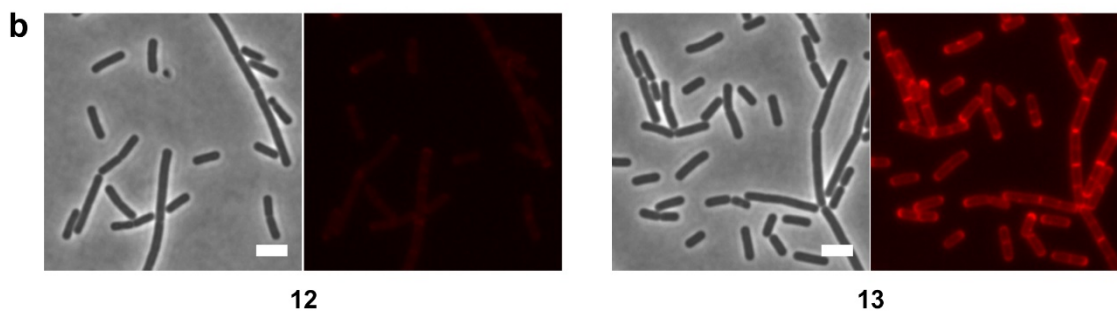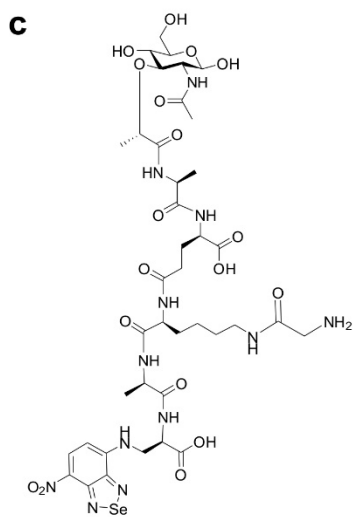

| PG-based structures including 13 | Calculated M+H <sup>+</sup> | Found M+H <sup>+</sup> |
|----------------------------------|-----------------------------|------------------------|
| MurNAc-Ala-gln-(Lys-Gly)-ala-13  | 1064.3235                   | 1064.5208              |
| MurNAc-Ala-gln-Lys-ala-13        | 1007.3021                   | 1007.4995              |
| gln-Lys-ala-13                   | 660.1566                    | 660.2976               |
| Lys-ala-13                       | 531.1141                    | 531.7435               |
| Other structures including 13    | Calculated M+H <sup>+</sup> | Found M+H <sup>+</sup> |
| Lys-[Gly <sub>2</sub> ]-ala-13   | 645.1570                    | 645.2945               |
| Lys-Gly-ala-13                   | 588.1355                    | 588.2736               |
| Lys-[Gly <sub>3</sub> ]-ala-13   | 859.2272                    | 859.3998               |

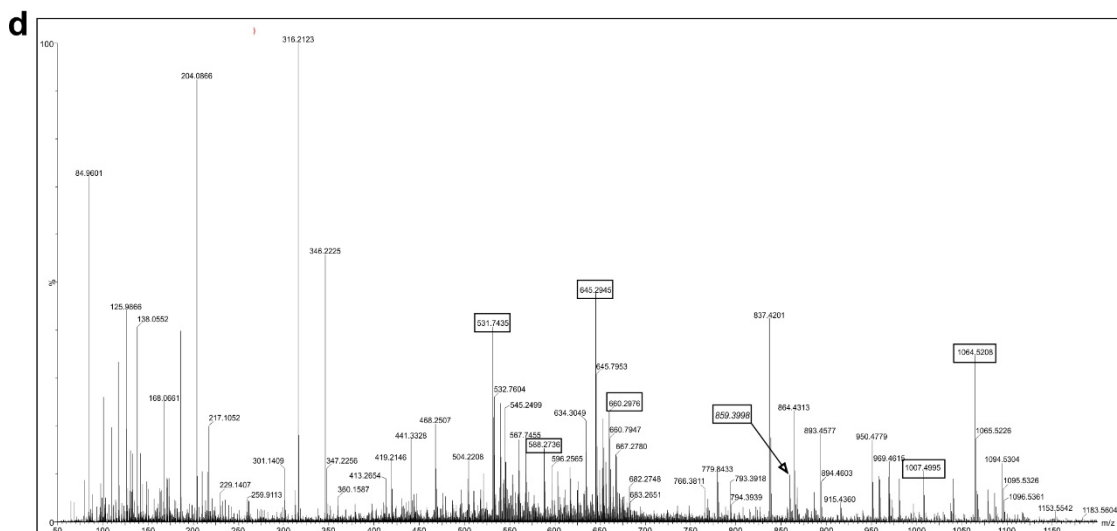

**Supplementary Figure 3. Selective incorporation of the amino acid 13 into bacterial cell walls.** (a) Representative phase and fluorescent microscopy images (from 2 independent experiments) of *E. coli* peptidoglycan sacculi isolated after the cells were grown in the presence of 100  $\mu$ M compound **13** or **NADA**<sup>1</sup> for 2 h in LB medium at 37 °C. Similar to **NADA**, compound **13** covalently labels *E. coli* peptidoglycan cell walls ( $\lambda_{exc}/em$ : 470/530 nm for **NADA** (green),  $\lambda_{exc}/em$ : 508/590 nm for **13** (red)). Because isolated cell walls are typically not visible in the phase channel, the samples were spiked with unlabeled cells as fiducial markers. Scale bar: 1  $\mu$ m. (b) Representative phase and fluorescent microscopy images (from 3 independent experiments) of *B. subtilis* incubated with compounds **12** or **13** (250  $\mu$ M) and subsequently imaged under phase and fluorescence microscopy. Comparative incorporation of compounds **12** and **13** was imaged by fluorescence emission ( $\lambda_{exc}/em$ : 508/590 nm) under the same image acquisition settings. Scale bar: 1  $\mu$ m. (c) Chemical structure of a muropeptide with compound **13** incorporated at position 5. Table summarizing structures identified by MS/MS from extracts of *Staphylococcus aureus* cells upon growth in the presence of compound **13**. [Gly<sub>n</sub>] indicate glycine bridges between the muropeptide stems. (d) MS spectrum for *S. aureus* muropeptides incorporating the amino acid **13**.

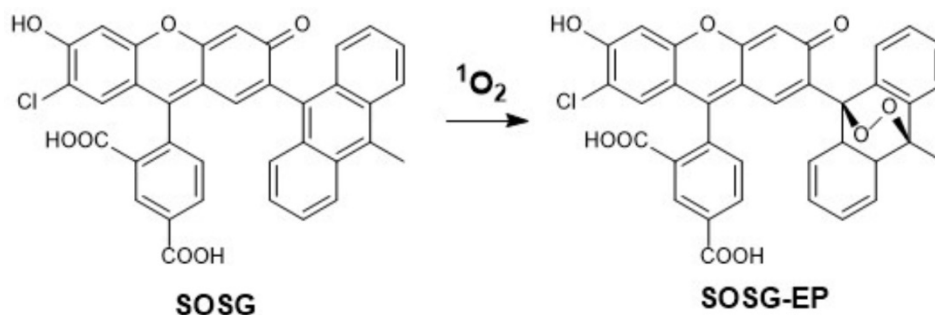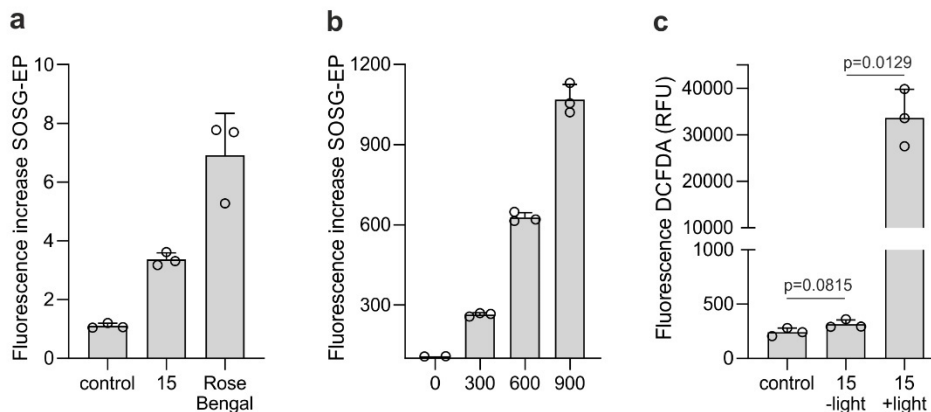

**Supplementary Figure 4. Singlet oxygen generation by compound 15 under single-photon and two-photon illumination.** Chemical structure of Singlet Oxygen Sensor Green (SOSG) and its fluorescent derivative (SOSG-EP) after reaction with singlet oxygen. (a) Singlet oxygen generation measured by fluorescence fold increase of SOSG (10  $\mu\text{M}$ ) in water after incubation with compound **15** (100  $\mu\text{M}$ ) and irradiation at 520 nm for 10 min; Rose Bengal (RB, 2.5  $\mu\text{M}$ ) was used as a positive control. Data presented as mean values $\pm$ SD (n=3). (b) Fluorescence emission (520 nm) of aqueous solutions containing compound **15** (100  $\mu\text{M}$ ) and SOSG (10  $\mu\text{M}$ ) upon two-photon illumination at 970 nm with increasing power. Data presented as mean values $\pm$ SD (n=3). (c) Flow cytometry of U87 cells after incubation with dichlorodihydrofluorescein diacetate (H2DCFDA) (20  $\mu\text{M}$ ) and compound **15** (100  $\mu\text{M}$ ) with or without illumination at 520 nm. Data presented as mean values $\pm$ SD (n=3 independent experiments). P values from two-tailed unpaired t tests.

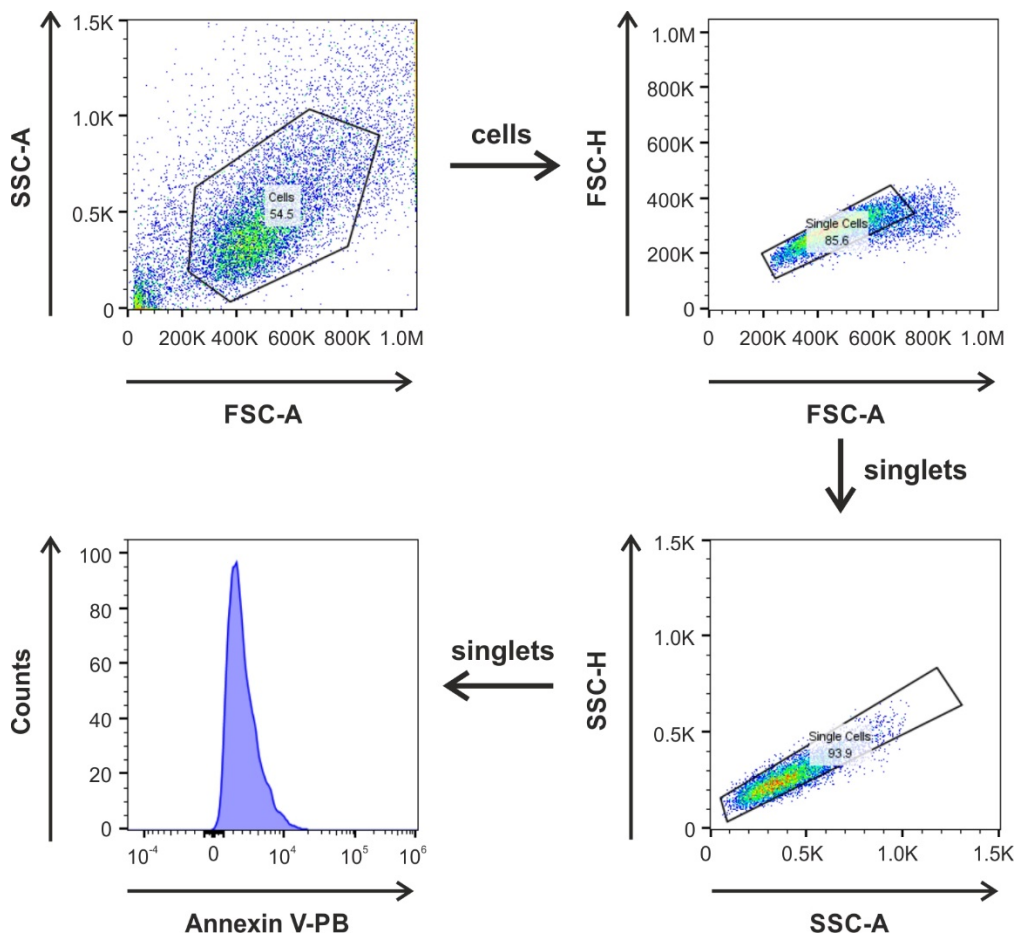

**Supplementary Figure 5. Gating strategy for U87 cells after different treatments with light and compound 15.** a) Gating strategy for the quantification of U87 cells after incubation with compounds **15-17** or AnnexinV-Pacific Blue and/or light irradiation. Representative plots from independent experiments performed in triplicate.

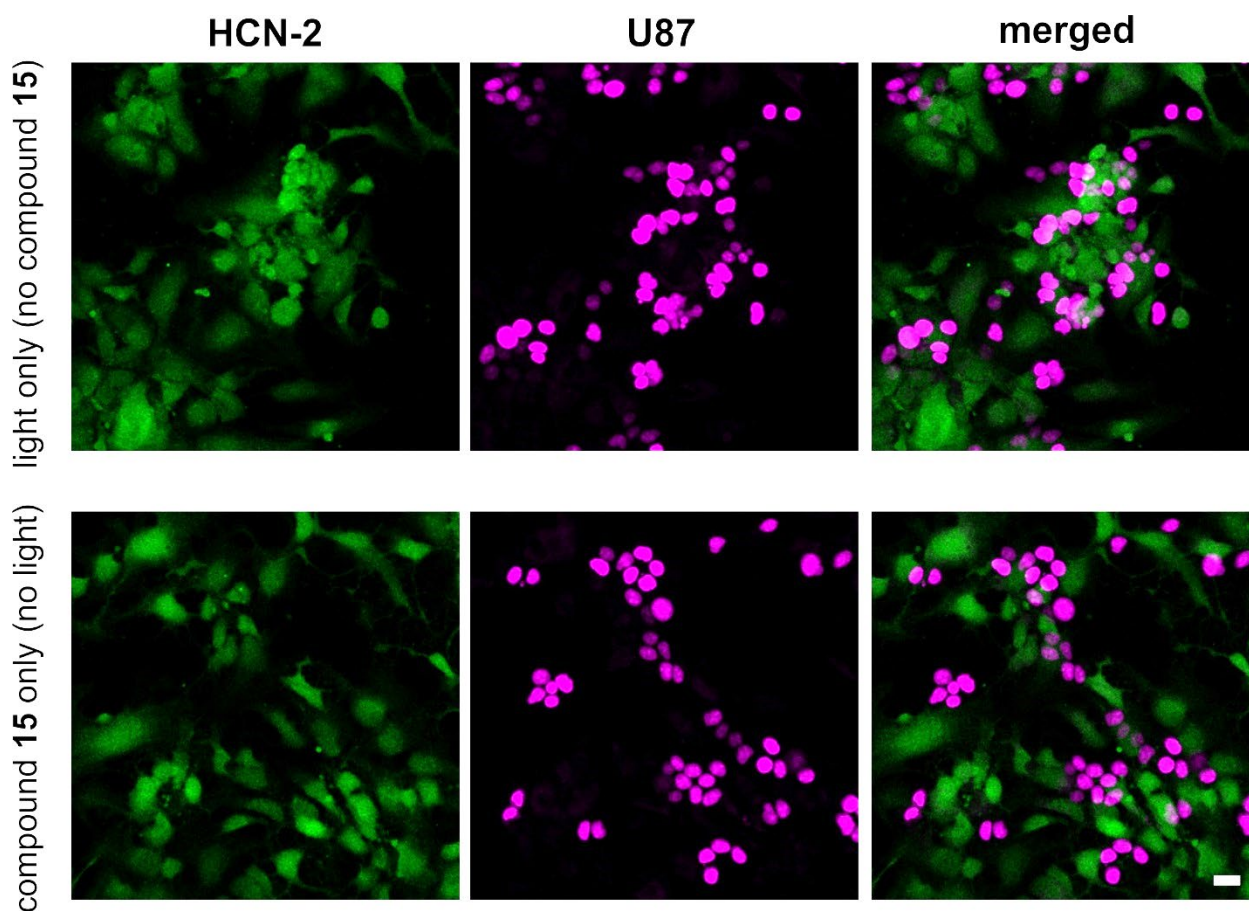

**Supplementary Figure 6. Compound 15 or light irradiation on their own do not kill U87 cells or HCN-2 cells in brain cell co-cultures.** Representative fluorescence confocal microscopy images (from 3 independent experiments) of human U87-nlsCrimson and HCN-2 co-cultures after light irradiation ( $37 \text{ J cm}^{-2}$ ) in the absence of compound **15** (top panels) or after incubation in the dark with compound **15** ( $100 \mu\text{M}$ ) (bottom panels). Viable CellMask Green-labeled HCN-2 cells display green fluorescence emission ( $\lambda_{\text{exc/em}}$ : 488/520 nm, green) and U87-nlsCrimson cells display far-red fluorescence emission ( $\lambda_{\text{exc/em}}$ : 610/645 nm, magenta). Scale bar:  $20 \mu\text{m}$ .



control zebrafish

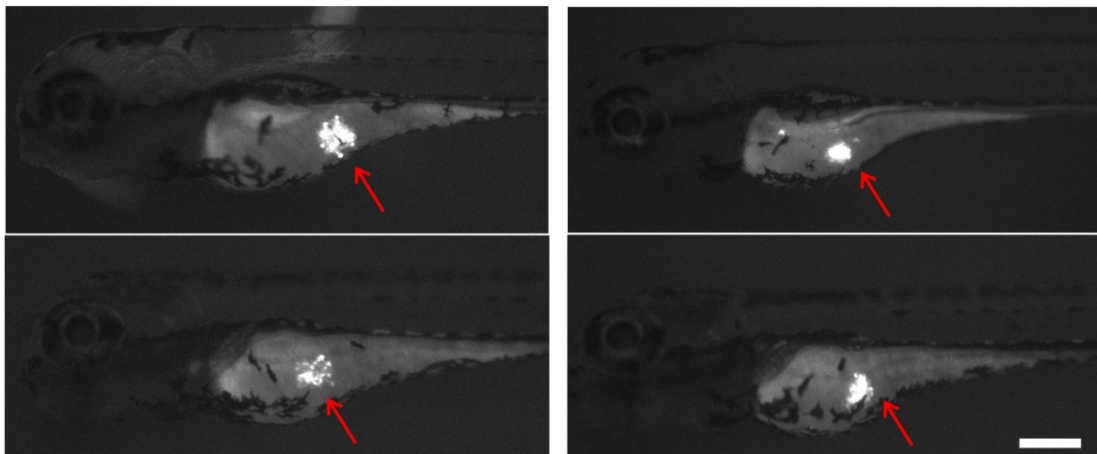

treated zebrafish (compound **15** + light irradiation)

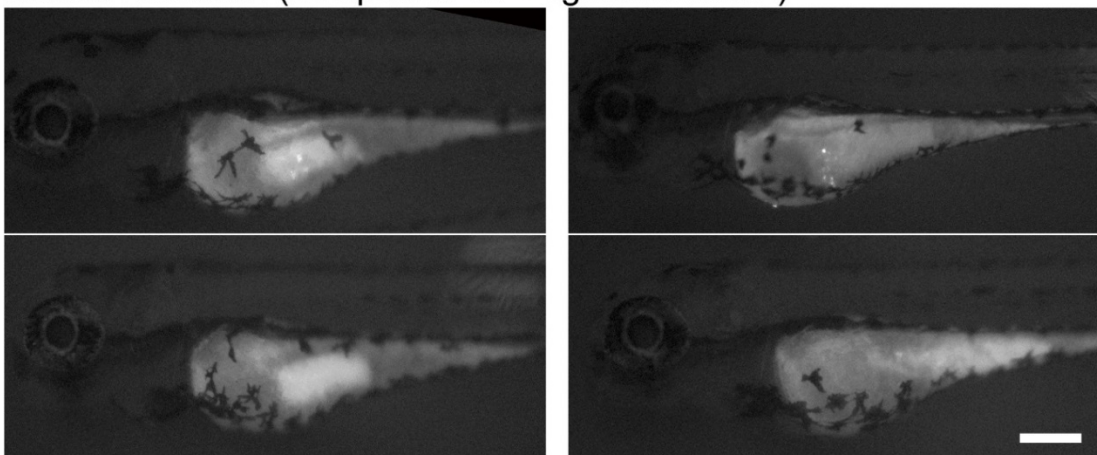

**Supplementary Figure 7. Combined treatment with compound 15 and light leads to removal of microtumors in vivo without changes in the morphology of zebrafish embryos.** Representative fluorescence confocal microscopy images of multiple zebrafish embryos (from 5 independent experiments) with human xenografts under physiological conditions and after injection of compound **15** (6 pg per zebrafish) followed by light illumination (10 mW, 37 J cm<sup>-2</sup>). Red arrows point at tumor xenografts, where viable U87-nlsCrimson cells were imaged by far-red fluorescence emission ( $\lambda_{exc/em}$ : 610/645 nm). Scale bar: 40  $\mu$ m.

## Supplementary Tables

**Supplementary Table 1.** Chemical and spectral characterization for compounds **2a-17**.

| Code       | HPLC purity | M <sub>calc.</sub> | M <sub>exp.</sub> | $\lambda_{\text{abs.}}$ (nm) <sup>‡</sup> | $\lambda_{\text{em.}}$ (nm) <sup>‡</sup> | $\Phi_{\Delta}$ (%) <sup>‡</sup> |
|------------|-------------|--------------------|-------------------|-------------------------------------------|------------------------------------------|----------------------------------|
| <b>2a</b>  | 99%         | 236.1              | 236.2             | 490                                       | 540                                      | n.d.                             |
| <b>3a</b>  | 99%         | 253.1              | 253.2             | 480                                       | 545                                      | n.d.                             |
| <b>4a</b>  | 99%         | 323.0              | 323.1             | 510                                       | 610                                      | n.d.                             |
| <b>5a</b>  | 93%         | 263.1              | 263.1             | 565                                       | 650                                      | n.d.                             |
| <b>6</b>   | 97%         | 312.2              | 312.4             | 510                                       | 620                                      | n.d.                             |
| <b>7</b>   | 99%         | 352.0              | 352.0             | 400                                       | 450                                      | n.d.                             |
| <b>8</b>   | 99%         | 368.0              | 367.9             | 440                                       | 630                                      | n.d.                             |
| <b>9</b>   | 96%         | 355.0              | 355.0             | 425                                       | 610                                      | n.d.                             |
| <b>11a</b> | 93%         | 426.9              | 426.8             | 500                                       | 650                                      | n.d.                             |
| <b>12</b>  | 99%         | 332.0              | 332.0             | 470                                       | 590                                      | 13±1                             |
| <b>13</b>  | 99%         | 332.0              | 332.0             | 470                                       | 590                                      | 8±1                              |
| <b>14</b>  | 96%         | 435.0              | 435.1             | 510                                       | 605                                      | 4.0±0.2                          |
| <b>15</b>  | 99%         | 407.0              | 407.0             | 495                                       | 610                                      | 24±1                             |
| <b>16</b>  | 99%         | 607.7              | 607.5             | 644                                       | 688                                      | <1                               |
| <b>17</b>  | 99%         | 697.8              | 697.3             | 320                                       | 496                                      | 21 <sup>†</sup>                  |

<sup>‡</sup> Absorbance and emission wavelengths in EtOH (concentration of compounds: 100  $\mu$ M).

\* Singlet oxygen generation quantum yields were determined using DPBF in EtOH (Note: DPBF was found insoluble in water) using Rose Bengal as a reference.<sup>2</sup> Data presented as means±SEM (n = 3).

<sup>†</sup> Reported value for TPE using 9,10-anthracenediylbis(mehtylen)diamalonic acid (ABDA) in water as a reference.<sup>3</sup>

## Supplementary Methods

### Chemical synthesis

**General materials.** Commercially available reagents were used without further purification. Thin-layer chromatography was conducted on Merck silica gel 60 F254 sheets and visualized by UV (254 and 365 nm). Silica gel (particle size 35–70  $\mu\text{m}$ ) was used for column chromatography.  $^1\text{H}$  and  $^{13}\text{C}$  spectra were recorded in a Bruker Avance 500 spectrometer (at 500 and 125 MHz, respectively). Data for  $^1\text{H}$  NMR spectra are reported as chemical shift  $\delta$  (ppm), multiplicity, coupling constant (Hz) and integration. Data for  $^{13}\text{C}$  NMR spectra reported as chemical shifts relative to the solvent peak. HPLC-MS analysis was performed on a Waters Alliance 2695 separation module connected to a Waters PDA2996 photodiode array detector and a ZQ Micromass mass spectrometer (ESI-MS) with a Phenomenex<sup>®</sup> column (C<sub>18</sub>, 5  $\mu\text{m}$ , 4.6 $\times$ 150 mm). HPLC purifications were conducted using a Waters semipreparative HPLC system fitted with a Phenomenex column (C18 Axial, 10  $\mu\text{m}$ , 21.2 $\times$ 150 mm) and UV detection.

***N,N*-diethyl-7-nitrobenzo[*c*][1,2,5] oxadiazol-4-amine (2a)**

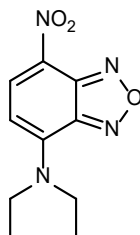

4-Chloro-7-nitrobenzo[*c*][1,2,5]oxadiazole (**NBD-Cl**, 20 mg, 0.08 mmol, 1 eq) was dissolved in EtOAc (1 mL). *N,N*-diethylamine (43  $\mu$ L, 0.24 mmol, 3 eq) was then added and the reaction was stirred at r.t. for 5 min. Upon completion, volatiles were removed under reduced pressure and the crude product was purified by column chromatography (DCM) to give compound **2a** (24 mg, orange solid, quantitative yield).

$^1\text{H}$  NMR (500 MHz, MeOD)  $\delta$  8.50 (d,  $J$  = 9.2 Hz, 1H), 6.41 (d,  $J$  = 9.2 Hz, 1H), 4.05 (br, s, 4H), 1.41 (t,  $J$  = 7.1 Hz, 6H).  $^{13}\text{C}$  NMR (125 MHz, MeOD)  $\delta$  145.1, 145.0, 144.5, 135.9, 101.3, 42.1, 10.1.

HRMS ( $m/z$ , ESI): calcd for  $\text{C}_{10}\text{H}_{13}\text{N}_4\text{O}_3^+$  [ $\text{M}+\text{H}$ ] $^+$ : 237.0982, found: 236.0971.

***N,N*-diethyl-7-nitrobenzo[*c*][1,2,5]thiadiazol-4-amine (3a)**

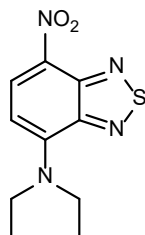

4-Fluoro-7-nitrobenzo[*c*][1,2,5]thiadiazole **3**<sup>4</sup> (20 mg, 0.08 mmol, 1 eq) was dissolved in MeCN (1 mL). Triethylamine (21  $\mu$ L, 0.12 mmol, 1.5 eq) was then added as well as *N,N*-diethylamine (22  $\mu$ L, 0.12 mmol, 1.5 eq) and reaction was stirred at r.t. for 5 min. Upon completion, volatiles were removed under reduced pressure and the crude product was purified by column chromatography (DCM:MeOH, 98:2) to give compound **3a** (24 mg, orange solid, 93%).

<sup>1</sup>H NMR (500 MHz, DMSO)  $\delta$  8.53 (d, *J* = 9.4 Hz, 1H), 6.65 (d, *J* = 9.4 Hz, 1H), 4.01 (q, *J* = 7.1 Hz, 4H), 1.32 (t, *J* = 7.1 Hz, 6H). <sup>13</sup>C NMR (125 MHz, DMSO)  $\delta$  150.2, 147.2, 145.2, 133.2, 126.3, 103.6, 48.0, 13.1.

HRMS (*m/z*, ESI): calcd for C<sub>10</sub>H<sub>13</sub>N<sub>4</sub>O<sub>2</sub>S<sup>+</sup> [M+H]<sup>+</sup>: 253.0754, found: 253.0741.

***N,N*-diethyl-7-nitrobenzo[*c*][1,2,5]selenadiazol-4-amine (4a)**

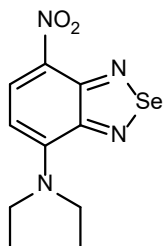

4-Fluoro-7-nitrobenzo[*c*][1,2,5]selenadiazole **4F<sup>4</sup>** (25 mg, 0.08 mmol, 1 eq) was dissolved in MeCN (1 mL). Triethylamine (21  $\mu$ L, 0.12 mmol, 1.5 eq) was then added as well as *N,N*-diethylamine (22  $\mu$ L, 0.12 mmol, 1.5 eq) and reaction was stirred at r.t. for 5 min. Upon completion, volatiles were removed under reduced pressure and the crude product was purified by column chromatography (DCM:MeOH 98:2) to give compound **4a** (21 mg, red solid, 70%).

<sup>1</sup>H NMR (500 MHz, DMSO-*d*<sub>6</sub>)  $\delta$  8.50 (d, *J* = 9.4 Hz, 1H), 6.48 (d, *J* = 9.4 Hz, 1H), 4.01 (q, *J* = 7.0 Hz, 4H), 1.32 (t, *J* = 7.0 Hz, 6H). <sup>13</sup>C NMR (125 MHz, DMSO-*d*<sub>6</sub>)  $\delta$  153.9, 152.4, 148.7, 134.1, 128.2, 101.9, 47.8, 13.2.

HRMS (*m/z*, ESI): calcd for C<sub>10</sub>H<sub>13</sub>N<sub>4</sub>O<sub>2</sub>SeNa<sup>+</sup> [M+H]<sup>+</sup>: 301.0199, found: 301.0188.

***N,N*-diethyl-2,2-dimethyl-7-nitro-2*H*-benzo[*d*]imidazol-4-amine (5a)**

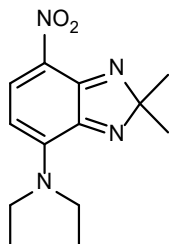

To a solution of 4-fluoro-2,2-dimethyl-7-nitro-2*H*-benzo[*d*]imidazole **5<sup>4</sup>** (10 mg, 0.05 mmol, 1 eq) in MeCN (1 mL), NaHCO<sub>3</sub> (11 mg, 0.13 mmol, 2.6 eq) in 0.5 mL H<sub>2</sub>O was added, followed by *N,N*-diethylamine (9 mL, 0.05 mmol, 1 eq) and the reaction was heated at 65 °C for 3h. The reaction mixture was then cooled down to r.t., acidified with 0.2 N HCl and extracted with EtOAc (2 × 20 mL). The organic layer was dried over anhydrous MgSO<sub>4</sub>, the solvent was removed under reduced pressure and the crude product was purified by column chromatography (DCM:MeOH 95:5) to give compound **5a** (10 mg, purple solid, 80%).

<sup>1</sup>H NMR (500 MHz, MeOD) δ 8.46 (d, *J* = 9.4 Hz, 1H), 6.00 (d, *J* = 9.4 Hz, 1H), 4.06 (br, s, 4H), 1.61 (s, 6H), 1.35 (t, *J* = 7.1 Hz, 6H). <sup>13</sup>C NMR (125 MHz, MeOD) δ 155.3, 152.2, 150.6, 143.2, 124.4, 104.9, 99.4, 21.2, 11.3.

HRMS (*m/z*, ESI): calcd for C<sub>13</sub>H<sub>19</sub>N<sub>4</sub>O<sub>2</sub><sup>+</sup> [*M*+*H*]<sup>+</sup>: 263.1503, found: 263.1511.

***N*-cyclohexyl-7-nitrobenzo[*c*][1,2,5]selenadiazol-4-amine (**6**)**

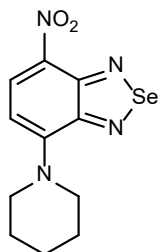

4-Fluoro-7-nitrobenzo[*c*][1,2,5]selenadiazole **4F** (20 mg, 0.08 mmol, 1 eq) was dissolved in MeCN (1 mL). Piperidine (24  $\mu$ L, 0.24 mmol, 3 eq) was then added and reaction was stirred at r.t. for 5 min. Upon completion, volatiles were removed under reduced pressure and the crude product was purified by column chromatography (DCM:MeOH 99:1) to give compound **6** (15 mg, red solid, 59%).

$^1\text{H}$  NMR (500 MHz, DMSO- $d_6$ )  $\delta$  8.50 (d,  $J$  = 9.1 Hz, 1H), 6.67 (d,  $J$  = 9.2 Hz, 1H), 4.06 – 4.01 (m, 4H), 1.73 (s, 6H).  $^{13}\text{C}$  NMR (125 MHz, DMSO- $d_6$ )  $\delta$  153.6, 153.3, 150.4, 133.4, 130.1, 104.8, 51.3, 26.3, 24.4.

HRMS ( $m/z$ , ESI): calcd for  $\text{C}_{11}\text{H}_{13}\text{N}_4\text{O}_2\text{Se}^+$  [ $\text{M}+\text{H}$ ] $^+$ : 313.0199, found: 313.0186.



#### 4-(4-methoxyphenoxy)-7-nitrobenzo[*c*][1,2,5]selenadiazole (**7**)

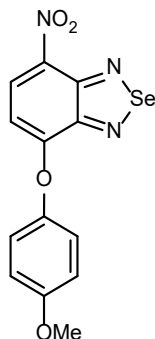

4-Fluoro-7-nitrobenzo[*c*][1,2,5]selenadiazole **4F** (20 mg, 0.08 mmol, 1 eq) was dissolved in MeCN (2 mL). 4-Methoxyphenol (12 mg, 0.08 mmol, 1 eq) was then added, followed by triethylamine (14  $\mu$ L, 0.08 mmol, 1 eq) and reaction was stirred at r.t. for 1.5 h. Volatiles were removed under reduced pressure and the crude product was purified by column chromatography (Hexane:EtOAc 8:2  $\rightarrow$  7:3) to give **7** (18 mg, orange solid, 63%).

$^1\text{H}$  NMR (500 MHz, DMSO-*d*<sub>6</sub>)  $\delta$  8.56 (d, *J* = 8.5 Hz, 1H), 7.29 (d, *J* = 9.1 Hz, 2H), 7.10 (d, *J* = 9.1 Hz, 2H), 6.59 (d, *J* = 8.5 Hz, 1H), 3.82 (s, 3H).  $^{13}\text{C}$  NMR (125 MHz, DMSO-*d*<sub>6</sub>)  $\delta$  157.6, 156.8, 153.4, 152.3, 147.3, 135.5, 131.4, 122.5, 116.0, 106.8, 56.0.

HRMS (*m/z*, ESI): calcd for C<sub>13</sub>H<sub>10</sub>N<sub>3</sub>O<sub>4</sub>Se<sup>+</sup> [M+H]<sup>+</sup>: 351.9832, found: 351.9827.

#### 4-((4-methoxyphenyl)thio)-7-nitrobenzo[c][1,2,5]selenadiazole (**8**)

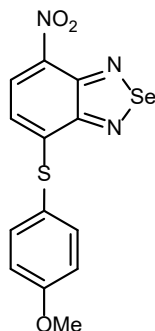

4-Fluoro-7-nitrobenzo[c][1,2,5]selenadiazole **4F** (20 mg, 0.08 mmol, 1 eq) was dissolved in MeCN (2 mL). 4-Methoxythiophenol (10  $\mu$ L, 0.08 mmol, 1 eq) was then added, followed by triethylamine (14  $\mu$ L, 0.08 mmol, 1 eq). A red precipitate was immediately formed, and after 5 min stirring at r.t. it was collected by filtration and washed with MeCN to give the expected product **8** (25 mg, red solid, 83%).

$^1\text{H}$  NMR (500 MHz, DMSO- $d_6$ )  $\delta$  8.39 (d,  $J$  = 8.1 Hz, 1H), 7.65 (d,  $J$  = 8.1 Hz, 2H), 7.20 (d,  $J$  = 8.1 Hz, 2H), 6.64 (d,  $J$  = 8.1 Hz, 1H), 3.87 (s, 3H).  $^{13}\text{C}$  NMR (125 MHz, DMSO- $d_6$ )  $\delta$  161.6, 156.8, 150.4, 146.7, 137.9, 137.6, 128.8, 119.5, 118.1, 116.7, 56.0.

HRMS (m/z, ESI): calcd for  $\text{C}_{13}\text{H}_{10}\text{N}_3\text{O}_3\text{SSe}^+ [\text{M}+\text{H}]^+$ : 367.9602, found: 367.9613.

#### 4-(4-methoxyphenyl)-7-nitrobenzo[c][1,2,5]selenadiazole (**9**)

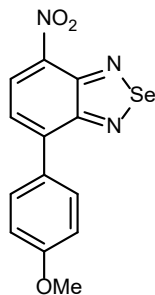

4-Chloro-7-nitrobenzo[c][1,2,5]selenadiazole **4Cl**<sup>4</sup> (20 mg, 0.08 mmol, 1 eq) and 4-methoxyphenylboronic acid (12 mg, 0.08 mmol, 1 eq) were placed in a round bottom flask fitted with a reflux condenser under a N<sub>2</sub> atmosphere. Dioxane (2 mL) was then added via a syringe and the mixture was stirred, followed by addition of CsCO<sub>3</sub> (74 mg, 0.24 mmol, 3 eq) and Pd(PPh<sub>3</sub>)<sub>4</sub> (4 mg, 20% wt.). Reaction was then heated at 100 °C for 2 h. It was then cooled down to r.t., diluted with brine (25 mL) and extracted with EtOAc (3 × 25 mL). The organic layer was dried over anhydrous MgSO<sub>4</sub>, the solvent was removed under reduced pressure and the crude product was purified by column chromatography (DCM:Hexane 1:1 → DCM) to give **9** (3 mg, orange solid, 10%).

<sup>1</sup>H NMR (500 MHz, DMSO-*d*<sub>6</sub>) δ 8.57 (d, *J* = 7.8 Hz, 1H), 7.97 (d, *J* = 8.9 Hz, 2H), 7.80 (d, *J* = 7.8 Hz, 1H), 7.14 (d, *J* = 8.9 Hz, 2H), 3.87 (s, 3H). <sup>13</sup>C NMR (125 MHz, DMSO-*d*<sub>6</sub>) δ 160.8, 159.2, 151.6, 141.5, 139.6, 135.0, 131.9, 129.4, 128.8, 128.3, 124.9, 114.5, 55.8. HRMS (*m/z*, ESI): calcd for C<sub>13</sub>H<sub>10</sub>N<sub>3</sub>O<sub>3</sub>Se<sup>+</sup> [M+H]<sup>+</sup>: 334.9828, found: 334.9838.

#### 4-fluoro-6-iodo-7-nitrobenzo[c][1,2,5]selenadiazole (**11**)

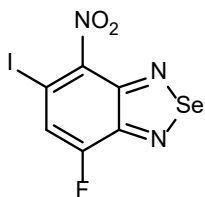

SeO<sub>2</sub> (44 mg, 0.6 mmol, 1.5 eq) was added to a solution of 3-fluoro-5-iodobenzene-1,2-diamine **10** (100 mg, 0.4 mmol, 1 eq) in EtOH (2 mL) and the reaction was refluxed for 3 h. Upon completion, the solvent was removed under reduced pressure and the crude product was quickly purified by column chromatography (DCM) to give 4-fluoro-6-iodobenzo[c][1,2,5]selenadiazole as a light yellow solid that was redissolved in concentrated H<sub>2</sub>SO<sub>4</sub> (2.5 mL) and concentrated HNO<sub>3</sub> (1 mL) and stirred for 2 h at r.t. Product was then precipitated upon addition of the reaction mixture into cold H<sub>2</sub>O (20 mL) and purified by column chromatography (DCM) to give **11** in ~65% purity (~35% of non-nitrated intermediate) and was used in the next step without further purification.

<sup>1</sup>H NMR (500 MHz, DMSO-*d*<sub>6</sub>) δ 7.94 (d, *J*<sub>H-F</sub> = 9.7 Hz, 1H).

HRMS (m/z, ESI): calcd for C<sub>6</sub>H<sub>2</sub>FIN<sub>3</sub>O<sub>2</sub>Se<sup>+</sup> [M+H]<sup>+</sup>: 371.8190, found: 371.8212.

***N,N*-diethyl-6-iodo-7-nitrobenzo[*c*][1,2,5]selenadiazol-4-amine (11a)**

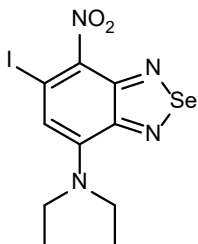

4-Fluoro-6-iodo-7-nitrobenzo[*c*][1,2,5]selenadiazole **11** (30 mg, 0.08 mmol, 1 eq) was dissolved in MeCN (2 mL). *N,N*-diethylamine (28  $\mu$ L, 0.16 mmol, 2 eq) was then added and reaction was stirred at r.t. for 3 h. Upon completion, volatiles were removed under reduced pressure and the crude product was purified by column chromatography (DCM:Hexane 1:1) to give **11a** (11 mg, red solid, 55%).

$^1\text{H}$  NMR (500 MHz, DMSO- $d_6$ )  $\delta$  6.65 (s, 1H), 3.89 (q,  $J$  = 7.0 Hz, 4H), 1.26 (t,  $J$  = 7.0 Hz, 6H).  $^{13}\text{C}$  NMR (125 MHz, DMSO- $d_6$ )  $\delta$  153.2, 151.8, 144.0, 137.1, 112.1, 98.9, 47.0, 13.1. HRMS ( $m/z$ , ESI): calcd for  $\text{C}_{10}\text{H}_{11}\text{IN}_4\text{O}_2\text{Se}^-$  [M] $^-$ : 425.9228, found: 425.9055.

**(S)-2-amino-3-((7-nitrobenzo[c][1,2,5]selenadiazol-4-yl)amino) propanoic acid hydrochloride (12)**

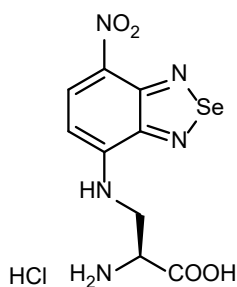

A solution of Boc-L-2,3-diaminopropionic acid (9 mg, 0.044 mmol, 1.1 eq) and NaHCO<sub>3</sub> (10 mg, 0.12 mmol, 3 eq) in water (0.4 mL) was heated at 55 °C. A solution of 4-fluoro-7-nitrobenzo[c][1,2,5]selenadiazole **4F** (10 mg, 0.04 mmol, 1 eq) in MeOH (1 mL) was then added dropwise and the reaction was kept stirring at 55 °C for 1 h. The solvent was removed under reduced pressure and the crude product was quickly purified by column chromatography (DCM:MeOH 9:1) to give *N*-Boc-(*S*)-2-amino-3-((7-nitrobenzo[c][1,2,5]selenadiazol-4-yl)amino)propanoic acid hydrochloride as a red solid, that was redissolved in 4 N HCl in dioxane (6 mL) and stirred for 30 min at r.t. to give **12** (15 mg, red solid, quantitative yield over two steps) upon removal of the solvent.

<sup>1</sup>H NMR (500 MHz, DMSO-*d*<sub>6</sub>) δ 8.62 (d, *J* = 8.8 Hz, 1H), 8.54 (br, s, 2H), 8.27 (br, t, *J* = 5.5 Hz, 1H), 6.56 (d, *J* = 8.9 Hz, 1H), 4.22 (t, *J* = 5.8 Hz, 1H), 4.13 – 3.87 (m, 2H). <sup>13</sup>C NMR (125 MHz, DMSO-*d*<sub>6</sub>) δ 169.5, 152.5, 152.1, 148.2, 135.2, 129.7, 98.4, 51.7, 43.2. HRMS (*m/z*, ESI): calcd for C<sub>9</sub>H<sub>10</sub>N<sub>5</sub>O<sub>4</sub>Se<sup>+</sup> [*M*+*H*]<sup>+</sup>: 331.9892, found 331.9895.

**(R)-2-amino-3-((7-nitrobenzo[c][1,2,5]selenadiazol-4-yl)amino) propanoic acid hydrochloride (13)**

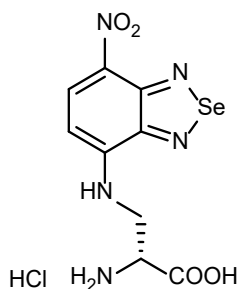

A solution of Boc-D-2,3-diaminopropionic acid (9 mg, 0.044 mmol, 1.1 eq) and NaHCO<sub>3</sub> (10 mg, 0.12 mmol, 3 eq) in water (0.4 mL) was heated at 55 °C. A solution of 4-fluoro-7-nitrobenzo[c][1,2,5]selenadiazole **4F** (10 mg, 0.04 mmol, 1 eq) in MeOH (1 mL) was then added dropwise and the reaction was kept stirring at 55 °C for 1 h. The solvent was removed under reduced pressure and the crude product was quickly purified by column chromatography (DCM:MeOH 9:1) to give *N*-Boc-(*R*)-2-amino-3-((7-nitrobenzo[c][1,2,5]selenadiazol-4-yl)amino)propanoic acid hydrochloride as a red solid, that was redissolved in 4 N HCl in dioxane (6 mL) and stirred for 30 min at r.t. to give **13** (15 mg, red solid, quantitative yield over two steps) upon removal of the solvent.

<sup>1</sup>H NMR (500 MHz, DMSO-*d*<sub>6</sub>) δ 8.61 (d, *J* = 8.9 Hz, 1H), 8.60 (br, s, 2H), 8.27 (br, t, *J* = 5.9 Hz, 1H), 6.57 (d, *J* = 8.9 Hz, 1H), 4.21 (t, *J* = 5.7 Hz, 1H), 4.08 – 3.89 (m, 2H). <sup>13</sup>C NMR (125 MHz, DMSO-*d*<sub>6</sub>) δ 169.5, 152.5, 152.1, 148.2, 135.2, 129.7, 98.5, 51.7, 43.1. HRMS (*m/z*, ESI): calcd for C<sub>9</sub>H<sub>10</sub>N<sub>5</sub>O<sub>4</sub>Se<sup>+</sup> [*M*+*H*]<sup>+</sup>: 331.9892, found 331.9895.

**(2*R*,3*R*,4*R*,5*S*,6*R*)-3-(ethyl(7-nitrobenzo[*c*][1,2,5]selenadiazol-4-yl)amino)-6(hydroxymethyl) tetrahydro-2*H*-pyran-2,4,5-triol (14)**

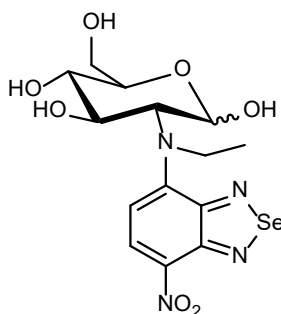

To a solution of 4-fluoro-7-nitrobenzo[*c*][1,2,5]selenadiazole **4F** (11 mg, 0.04 mmol, 1 eq) in MeCN (0.5 mL) was added 2-ethylamino-2-deoxy-D-glucose.<sup>5</sup> (9 mg, 0.04 mmol, 1 eq) in saturated NaHCO<sub>3</sub> (aq) (0.2 mL) and the reaction was stirred at r.t. for 48 h. The solvent was removed under reduced pressure and the crude product was purified by column chromatography (DCM:MeOH 9:1) to give compound **14** (3 mg, red solid, 16%, ~ 1.3:1 mixture of anomers).

<sup>1</sup>H NMR (500 MHz, MeOD) δ 8.63 (d, *J* = 9.2 Hz, 1H), 8.62 (d, *J* = 9.2 Hz, 1H), 6.77 (d, *J* = 9.2 Hz, 1H), 6.66 (d, *J* = 9.4 Hz, 1H), 5.73 (d, *J* = 3.2 Hz, 1H), 5.59 – 5.52 (m, 1H), 5.42 (dd, *J* = 10.7, 3.3 Hz, 1H), 5.07 (d, *J* = 8.1 Hz, 1H), 4.19 (dd, *J* = 10.7, 8.4 Hz, 1H), 4.10 (dd, *J* = 14.6, 7.2 Hz, 1H), 4.01 – 3.85 (m, 6H), 3.79 – 3.72 (m, 2H), 3.49 – 3.42 (m, 2H), 3.38 – 3.35 (m, 2H), 1.37 (t, *J* = 7.0 Hz, 3H), 1.33 (t, *J* = 6.9 Hz, 3H). <sup>13</sup>C NMR (125 MHz, MeOD) δ 154.0, 153.9, 153.8, 153.6, 150.9, 150.6, 133.2, 133.0, 129.9, 129.7, 105.4, 104.7, 94.5, 93.5, 76.5, 72.9, 72.3, 71.7, 70.6, 67.2, 65.4, 61.4, 40.5, 11.8, 11.1.

HRMS (*m/z*, ESI): calcd for C<sub>14</sub>H<sub>19</sub>N<sub>4</sub>O<sub>7</sub>Se<sup>+</sup> [M+H]<sup>+</sup>: 435.0419, found 435.1001.



**(2*R*,3*R*,4*R*,5*S*,6*R*)-6-(hydroxymethyl)-3-((7-nitrobenzo[*c*][1,2,5]selenadiazol-4-yl)amino)tetrahydro-2*H*-pyran-2,4,5-triol (15)**

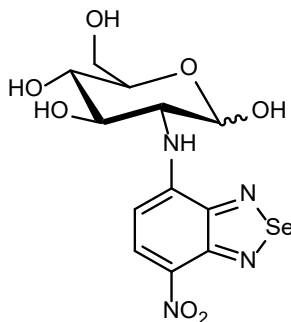

To a solution of 4-fluoro-7-nitrobenzo[*c*][1,2,5]selenadiazole **4F** (30 mg, 0.14 mmol, 1 eq) in MeCN (0.8 ml) was added 2-amino-2-deoxy-D-glucose hydrochloride (39 mg, 0.16 mmol, 1.1 eq) in saturated NaHCO<sub>3(aq)</sub> (0.8 mL) and the reaction was stirred at 30 °C for 24 h. The solvent was removed under reduced pressure and the crude product was purified by column chromatography (DCM:MeOH 9:1) to give compound **15** (5 mg, orange solid, 13%, ~ 1.8:1 mixture of anomers ).

<sup>1</sup>H NMR (500 MHz, DMSO-*d*<sub>6</sub>) δ 8.55 (d, *J* = 7.4 Hz, 1H), 7.03 (s, 1H), 6.57 (d, *J* = 7.4 Hz, 1H), 5.17 (s, 2H), 5.10 – 5.03 (m, 1H), 4.52 – 4.45 (m, 1H), 3.85 – 3.65 (m, 4H), 3.50 – 3.47 (m, 1H). <sup>13</sup>C NMR (125 MHz, DMSO-*d*<sub>6</sub>) 152.1, 148.5, 135.6, 128.7, 99.0, 90.5, 73.3, 73.0, 70.8, 61.5, 58.2.

HRMS (*m/z*, ESI): calcd. for C<sub>12</sub>H<sub>15</sub>N<sub>4</sub>O<sub>7</sub>Se<sup>+</sup> [*M*+*H*]<sup>+</sup>: 407.0092, found: 407.0100.

**6-oxo-6-(((3R,4R,5S,6R)-2,4,5-trihydroxy-6-(hydroxymethyl)tetrahydro-2H-pyran-3-yl)amino)hexanoic acid (pre-16)**

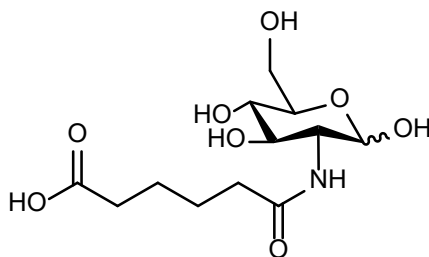

2-Amino-2-deoxy-D-glucose hydrochloride (216 mg, 1 mmol, 1 eq) was dissolved in DMF (5 mL) and H<sub>2</sub>O (1 mL). Oxepane-2,7-dione (128 mg, 1 mmol, 1 eq) was then added followed by *N*-methylmorpholine (0.2 mL) and reaction was stirred at r.t. overnight. The expected product **pre-16** was then precipitated with Et<sub>2</sub>O to give 252 mg of an off-white solid, that was used without further purification.

HRMS (m/z, ESI): calcd. for C<sub>12</sub>H<sub>21</sub>NO<sub>8</sub>Na [M+Na]<sup>+</sup>: 330.1159, found: 330.1160.



***N*-ethyl-*N*-(5-(6-oxo-6-(((3*R*,4*R*,5*S*,6*R*)-2,4,5-trihydroxy-6-(hydroxymethyl) tetrahydro-2*H*-pyran-3-yl)amino)hexanamido)-9*H*-benzo[*a*]phenoxazin-9-ylidene)ethanaminium (**16**)**

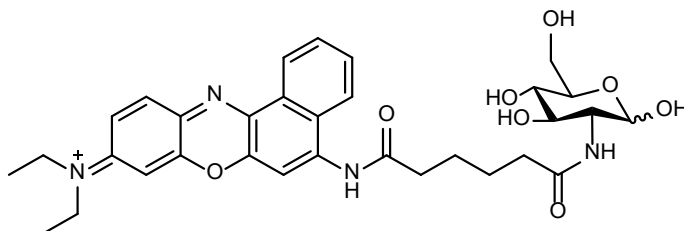

6-Oxo-6-(((3*R*,4*R*,5*S*,6*R*)-2,4,5-trihydroxy-6-(hydroxymethyl)tetrahydro-2*H*-pyran-3-yl) amino)hexanoic acid **pre-16** (10 mg, 0.03 mmol, 1 eq) was dissolved in DMF (0.5 mL), then COMU (21 mg, 0.05 mmol, 1.5 eq) was added and the mixture was stirred at r.t. for 5 min. Nile Blue (13 mg, 0.03 mmol, 1 eq) and *N,N*-diisopropylethylamine (18  $\mu$ L, 0.1 mmol, 3 eq) were then added and reaction was stirred at r.t. for 2 h. It was then purified by semi-preparative HPLC to give compound **16** (6 mg, blue solid, 30%, mixture of anomers).

<sup>1</sup>H NMR (500 MHz, DMSO-*d*<sub>6</sub>, main anomer signals)  $\delta$  8.14 (s, 1H), 7.76 – 7.65 (m, 2H), 7.63 – 7.48 (m, 2H), 6.90 – 6.75 (m, 1H), 6.50 – 6.46 (m, 1H), 6.45 – 6.36 (m, 1H), 5.01 – 4.85 (m, 3H), 4.64 – 4.36 (m, 3H), 3.73 – 3.57 (m, 5H), 3.18 – 3.03 (m, 2H), 2.45 – 2.32 (m, 1H), 2.22 – 2.10 (3H), 1.75 – 1.54 (m, 4H), 1.29 – 1.09 (m, 6H). <sup>13</sup>C NMR (125 MHz, DMSO-*d*<sub>6</sub>, main anomer signals)  $\delta$  174.9, 172.7, 172.5, 169.3, 163.5, 159.8, 153.0, 149.3, 147.3, 136.4, 131.8, 130.5, 129.4, 126.2, 124.2, 122.7, 120.3, 119.0, 96.0, 91.1, 77.3, 74.8, 72.5, 71.6, 71.4, 71.0, 61.6, 57.6, 54.7, 44.8, 36.5, 36.0, 34.0, 31.2, 25.6, 24.8, 12.7. HRMS (*m/z*, ESI): calcd. for C<sub>32</sub>H<sub>39</sub>N<sub>4</sub>O<sub>8</sub> [M]<sup>+</sup>: 607.2762, found: 607.2754.

***N'*-1-(4-(2,2-bis(4-methoxyphenyl)-1-phenylvinyl)phenyl)-*N'*-6-((3*R*,4*R*,5*S*,6*R*)-2,4,5-trihydroxy-6-(hydroxymethyl)tetrahydro-2*H*-pyran-3-yl)adipamide (17)**

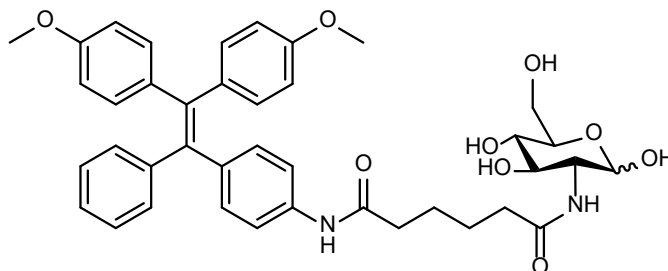

6-Oxo-6-(((3*R*,4*R*,5*S*,6*R*)-2,4,5-trihydroxy-6-(hydroxymethyl)tetrahydro-2*H*-pyran-3-yl)amino)hexanoic acid **pre-16** (20 mg, 0.06 mmol, 1 eq) was dissolved in DMF (1 mL), then COMU (43 mg, 0.1 mmol, 1.5 eq) was added and the mixture was stirred at r.t. for 5 min. 4-(2,2-Bis(4-methoxyphenyl)-1-phenylvinyl)aniline **pre-17** (27 mg, 0.06 mmol, 1 eq) and *N,N*-diisopropylethylamine (36  $\mu$ L, 0.2 mmol, 3 eq) were then added and reaction was stirred at r.t. for 3 h. It was then purified by semi-preparative HPLC to give compound **17** (7 mg, off-white solid, 15%, one major anomer containing traces of a minor anomer).

$^1\text{H}$  NMR (500 MHz,  $\text{DMSO-}d_6$ )  $\delta$  9.83 (s, 1H), 8.46 (br, s, 1H), 7.35 (d,  $J = 8.5$  Hz, 2H), 7.22 – 7.04 (m, 3H), 7.02 – 6.92 (m, 2H), 6.90 – 6.83 (m, 6H), 6.72 (d,  $J = 8.8$  Hz, 2H), 6.68 (d,  $J = 8.8$  Hz, 2H), 4.93 (s, 2H), 4.70 – 4.48 (m, 1H), 4.46 – 4.37 (m, 1H), 3.69 (s, 3H), 3.67 (s, 3H), 3.63 – 3.56 (m, 2H), 3.54 – 3.44 (m, 2H), 3.23 – 2.99 (m, 2H), 2.26 (t,  $J = 6.9$  Hz, 2H), 2.18 – 2.08 (m, 2H), 1.61 – 1.46 (m, 4H).  $^{13}\text{C}$  NMR (125 MHz,  $\text{DMSO-}d_6$ )  $\delta$  173.0, 172.6, 171.6, 158.12, 158.09, 144.4, 139.8, 138.92, 138.86, 137.9, 136.34, 136.28, 132.5, 131.5, 131.2, 128.3, 126.7, 118.8, 113.7, 113.6, 96.1, 91.1, 77.3, 74.8, 72.5, 71.6, 71.3, 70.9, 61.6, 57.6, 55.39, 55.37, 54.8, 36.7, 36.0, 35.5, 25.4.

HRMS ( $m/z$ , ESI): calcd. for  $\text{C}_{40}\text{H}_{45}\text{N}_2\text{O}_9$   $[\text{M}+\text{H}]^+$ : 697.3120, found: 697.3139.

# <sup>1</sup>H and <sup>13</sup>C NMR spectra

## Compound 2a

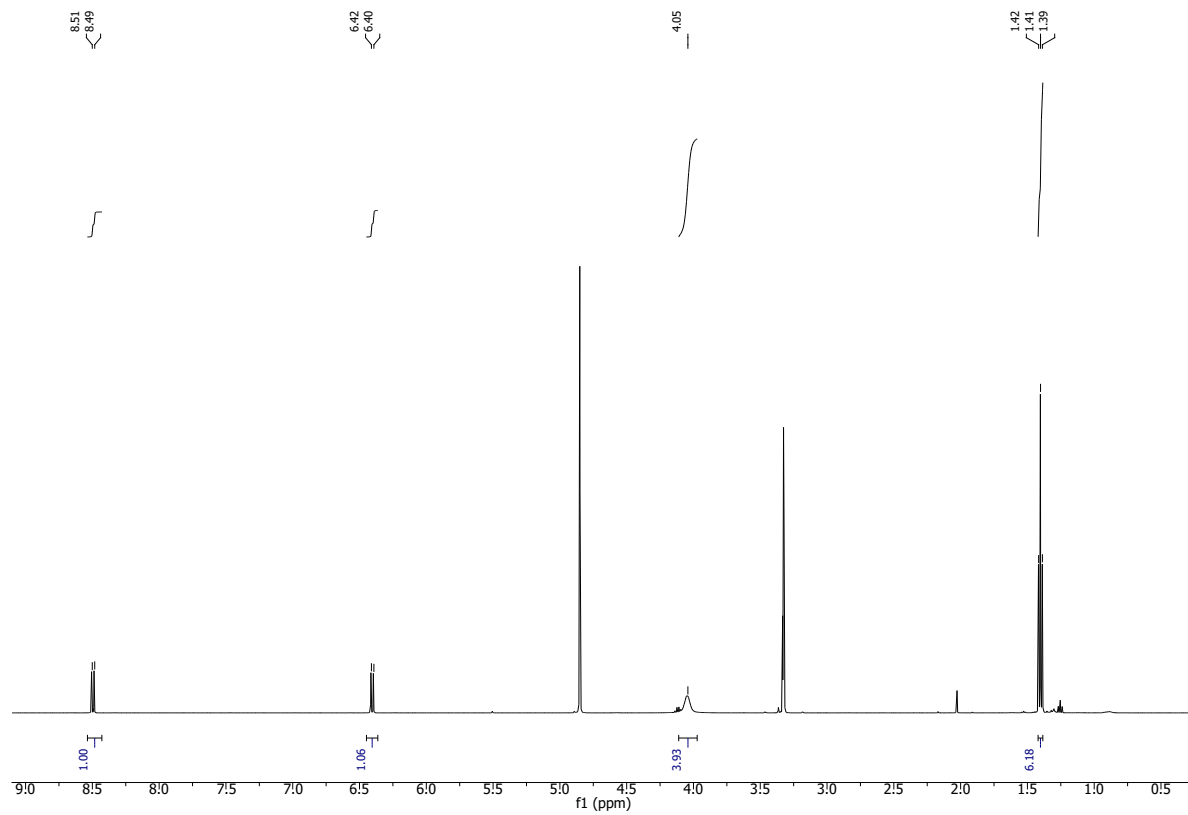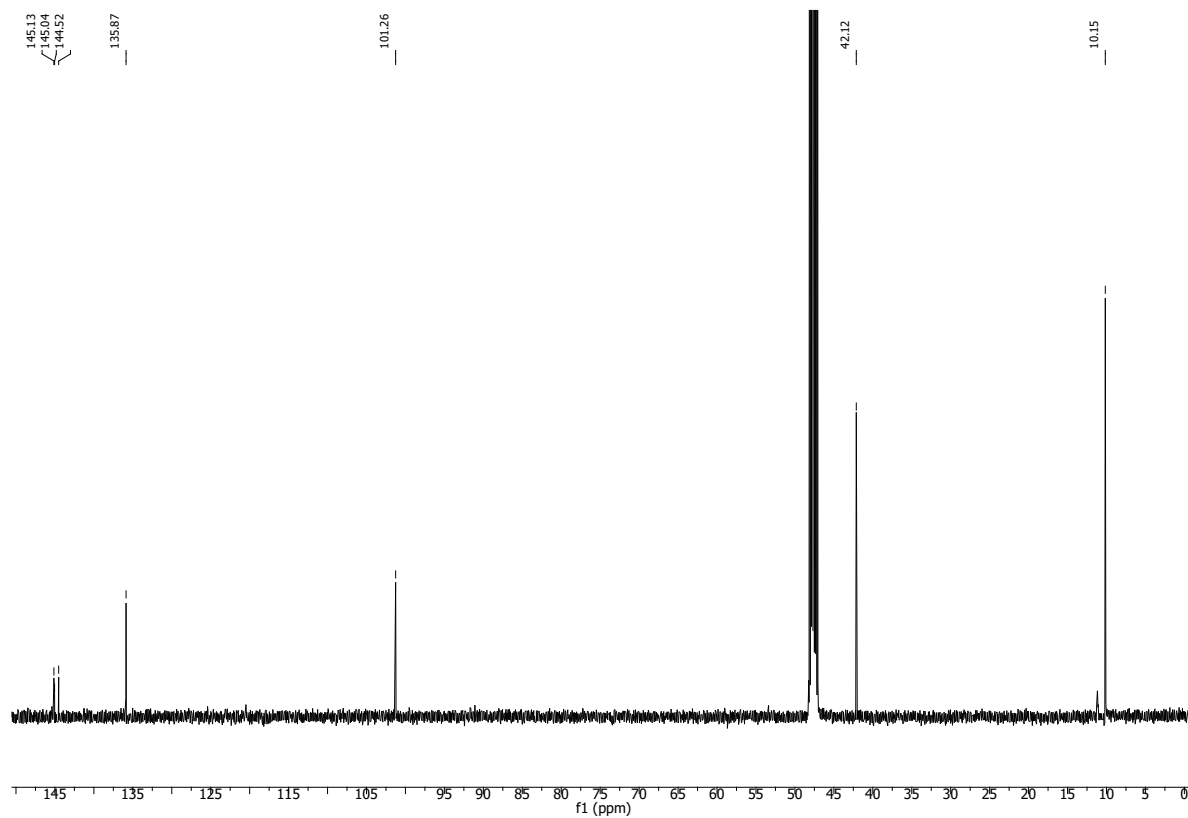

# Compound 3a

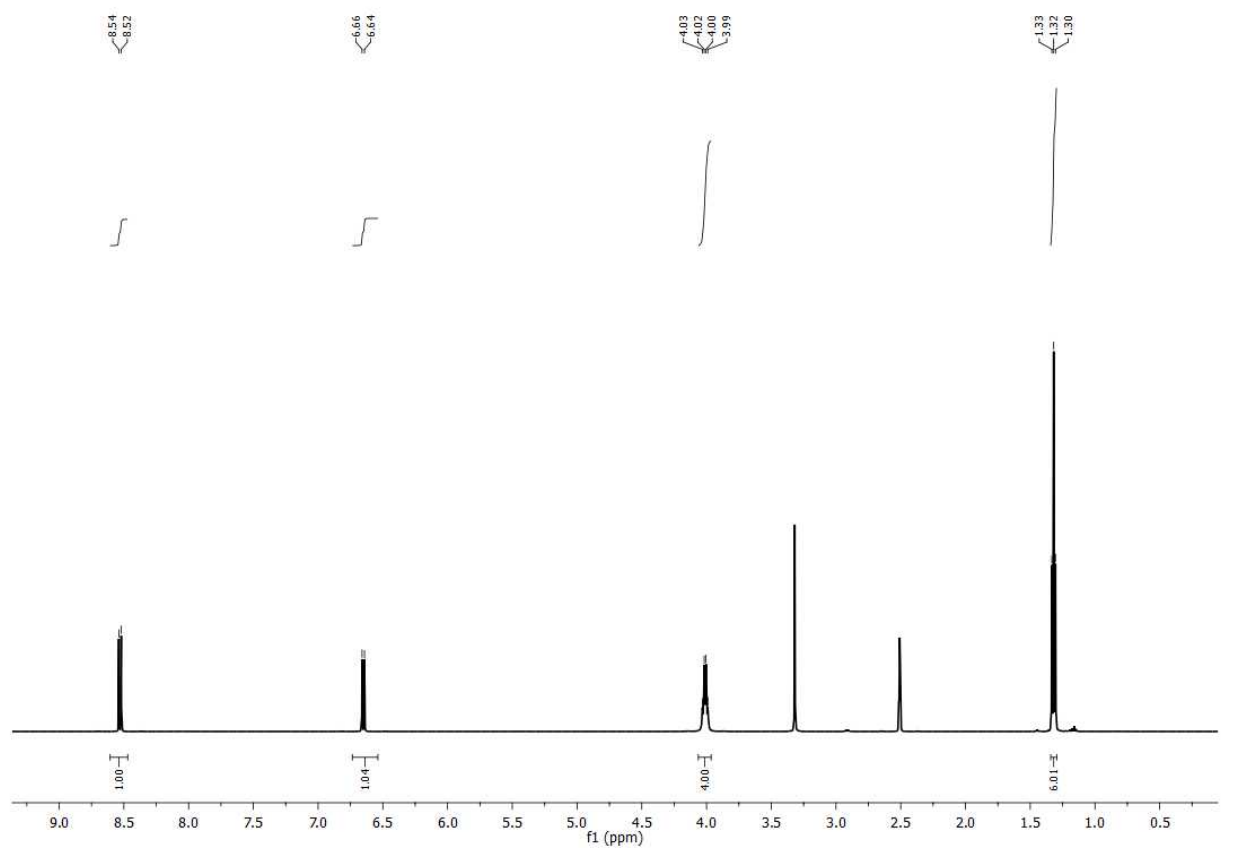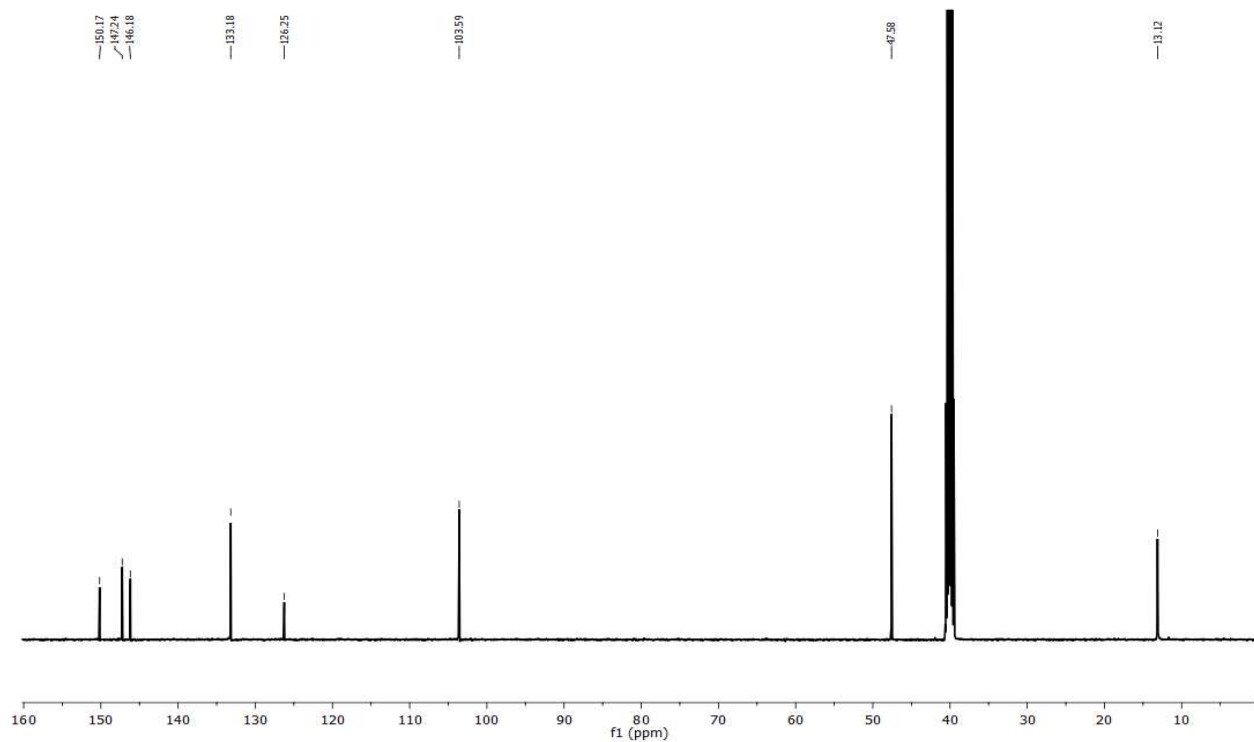

# Compound 4a

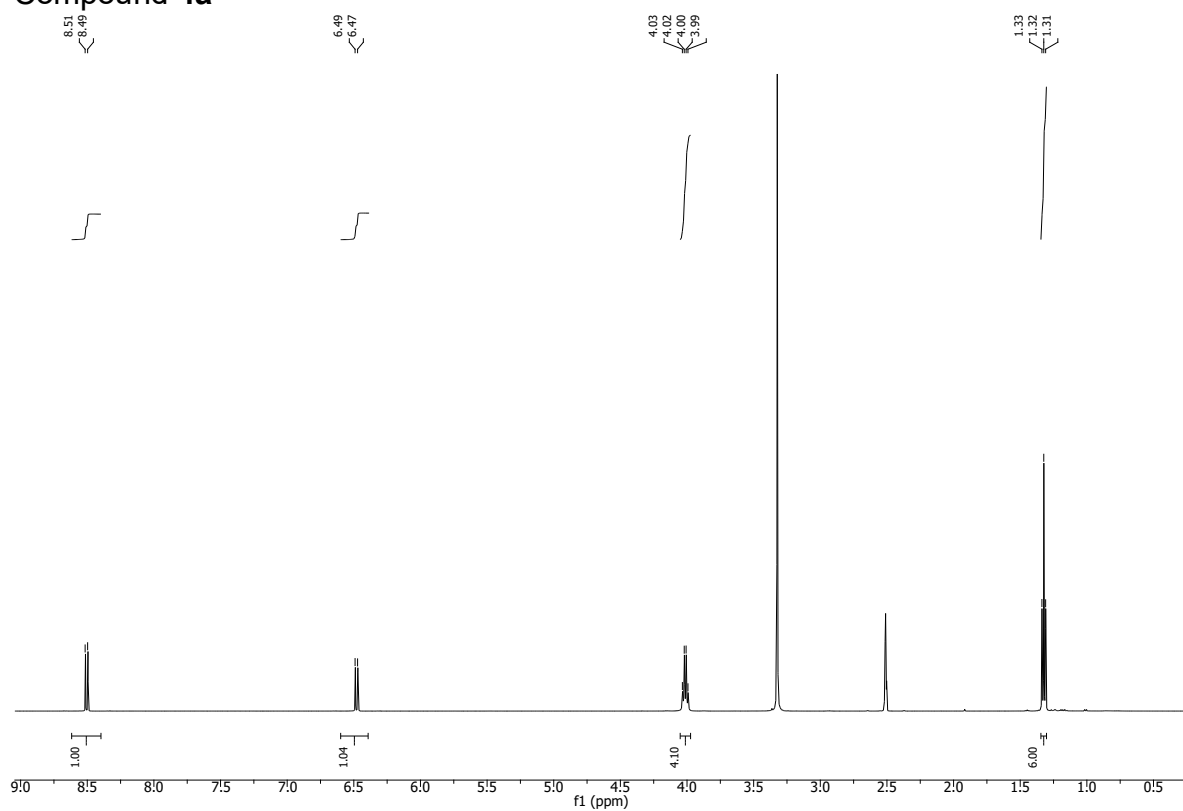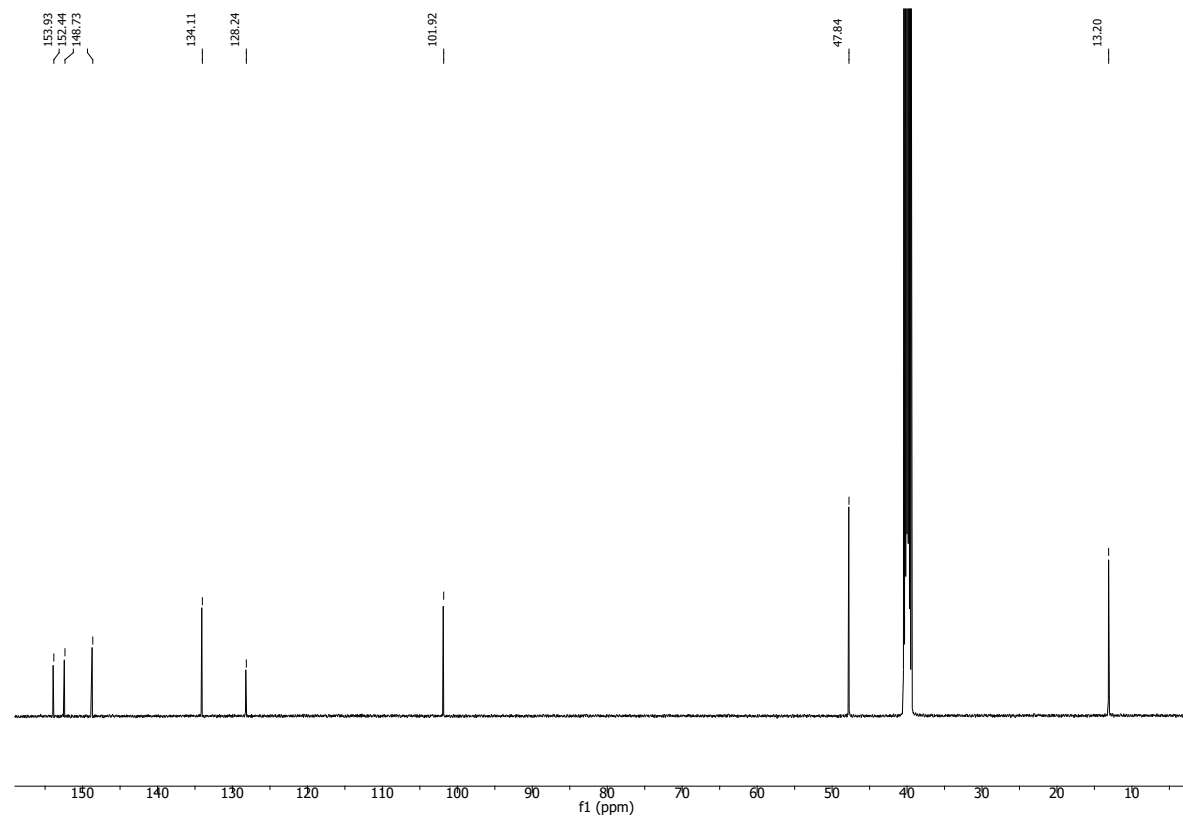



# Compound 5a

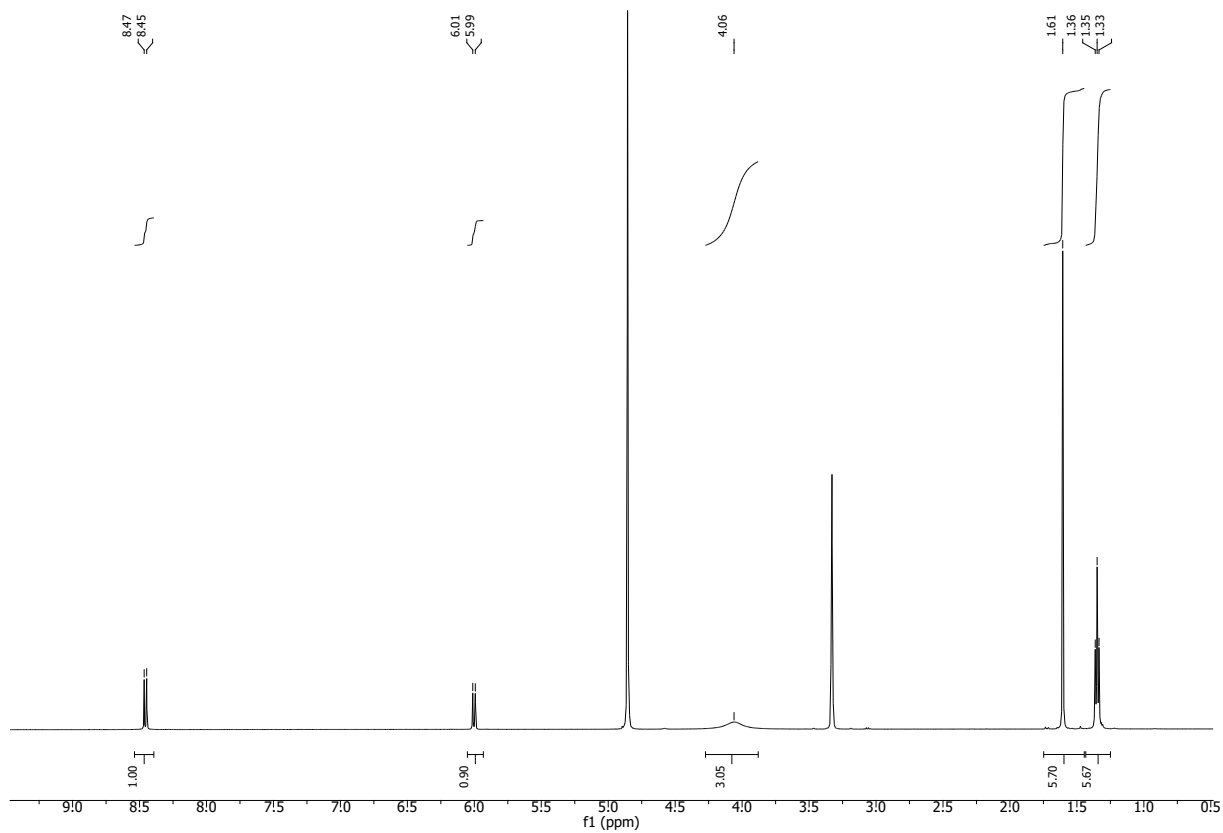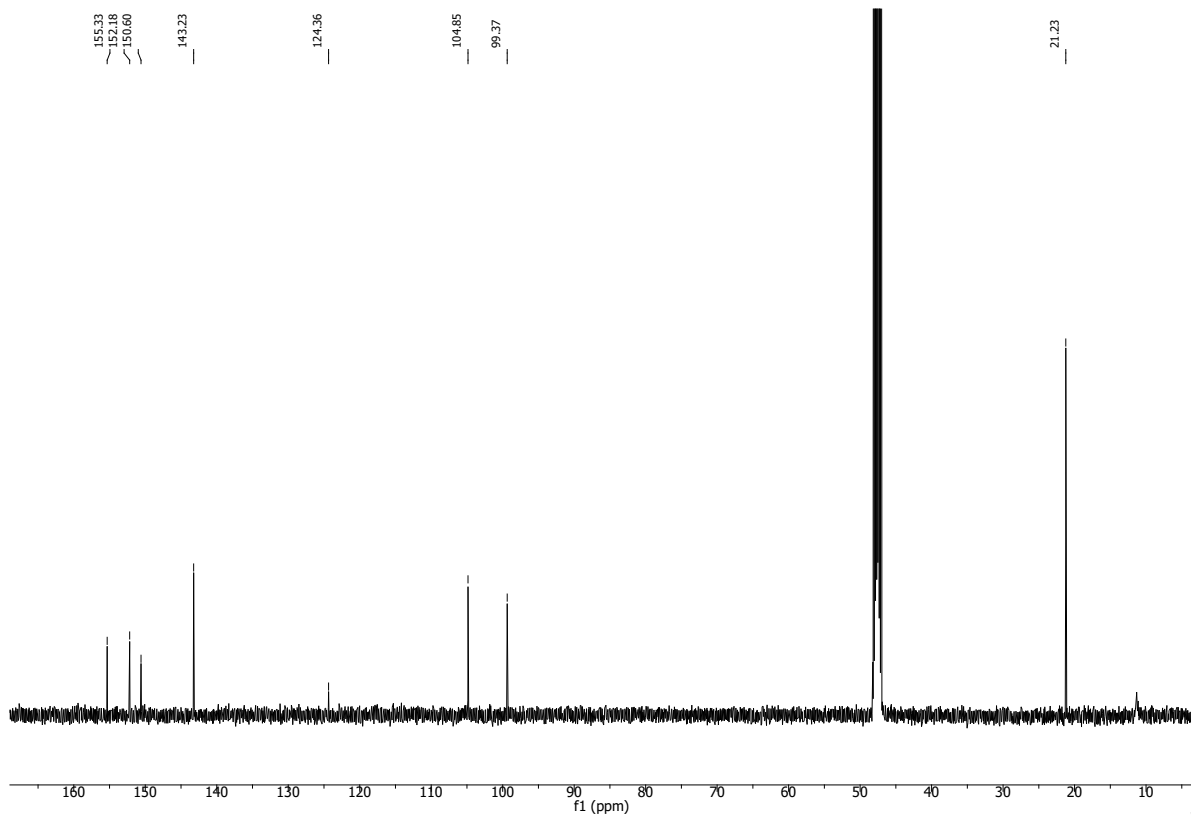

Compound **6** (contains traces of residual DCM)

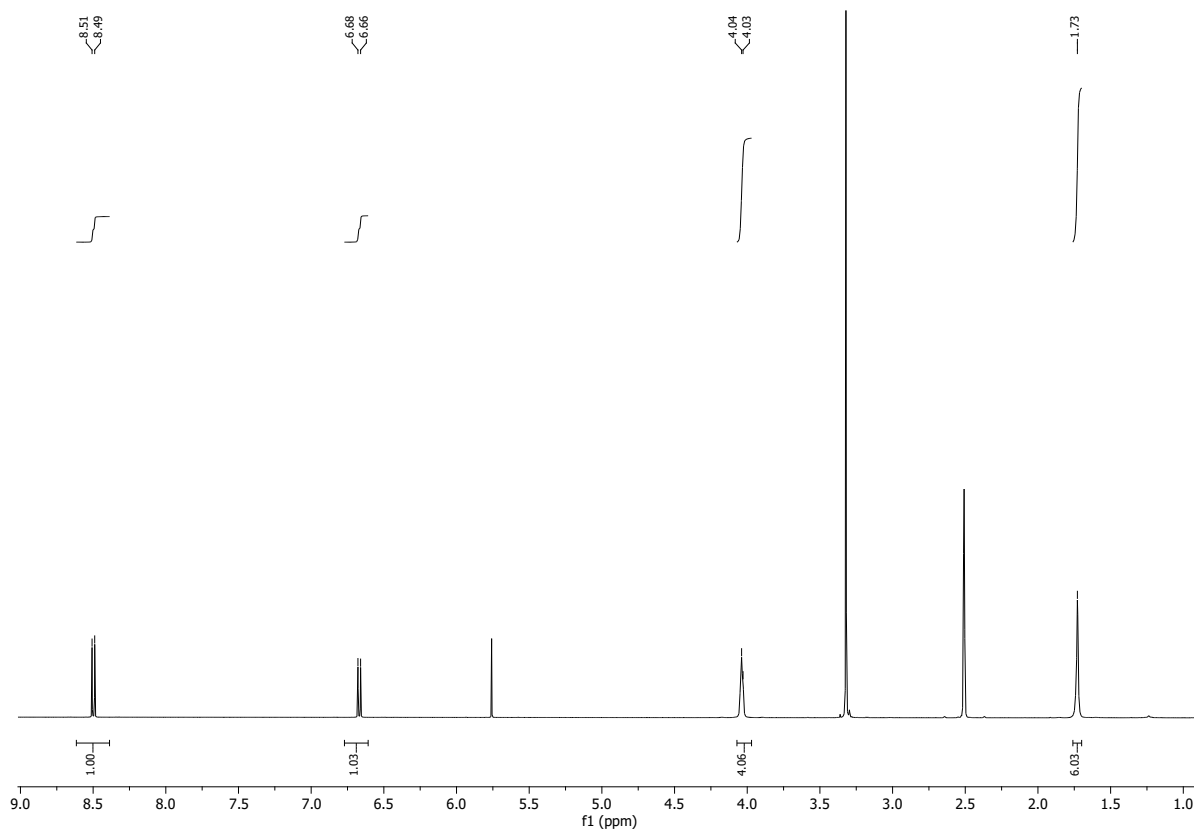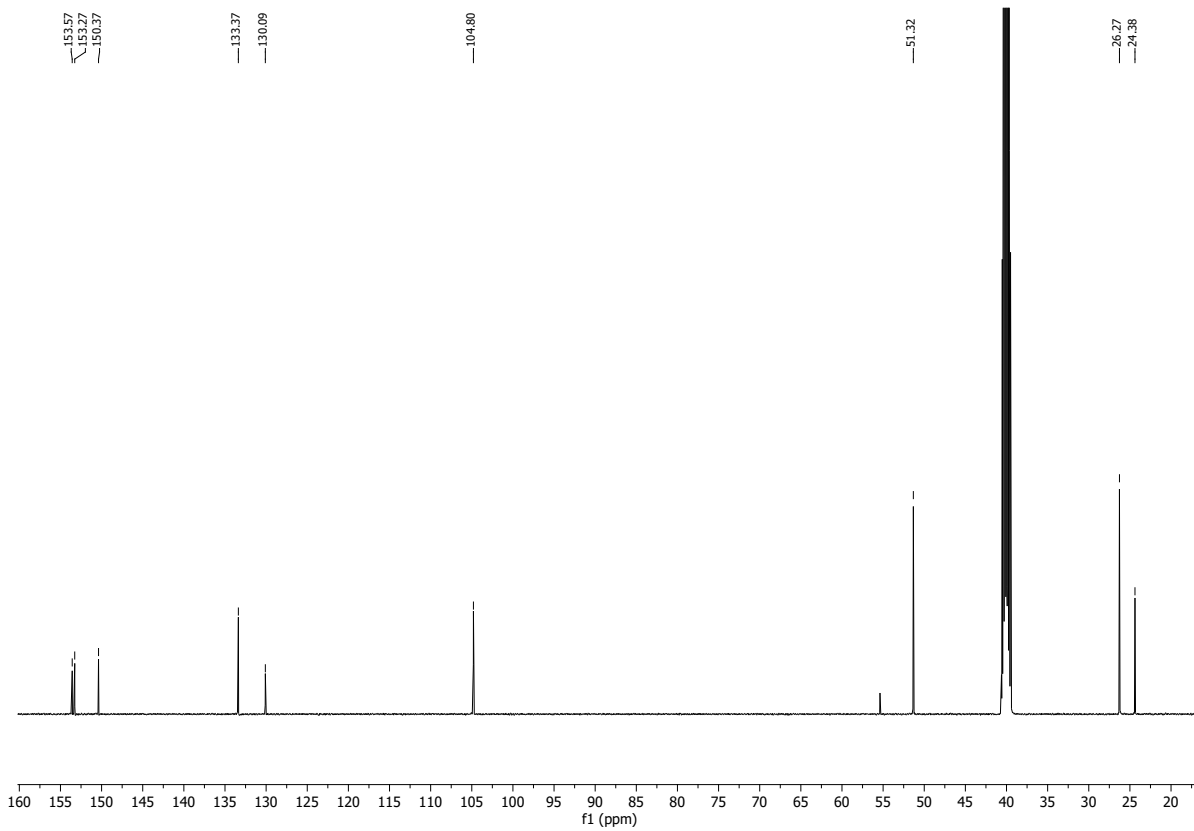

Compound 7 (contains traces of residual DCM)

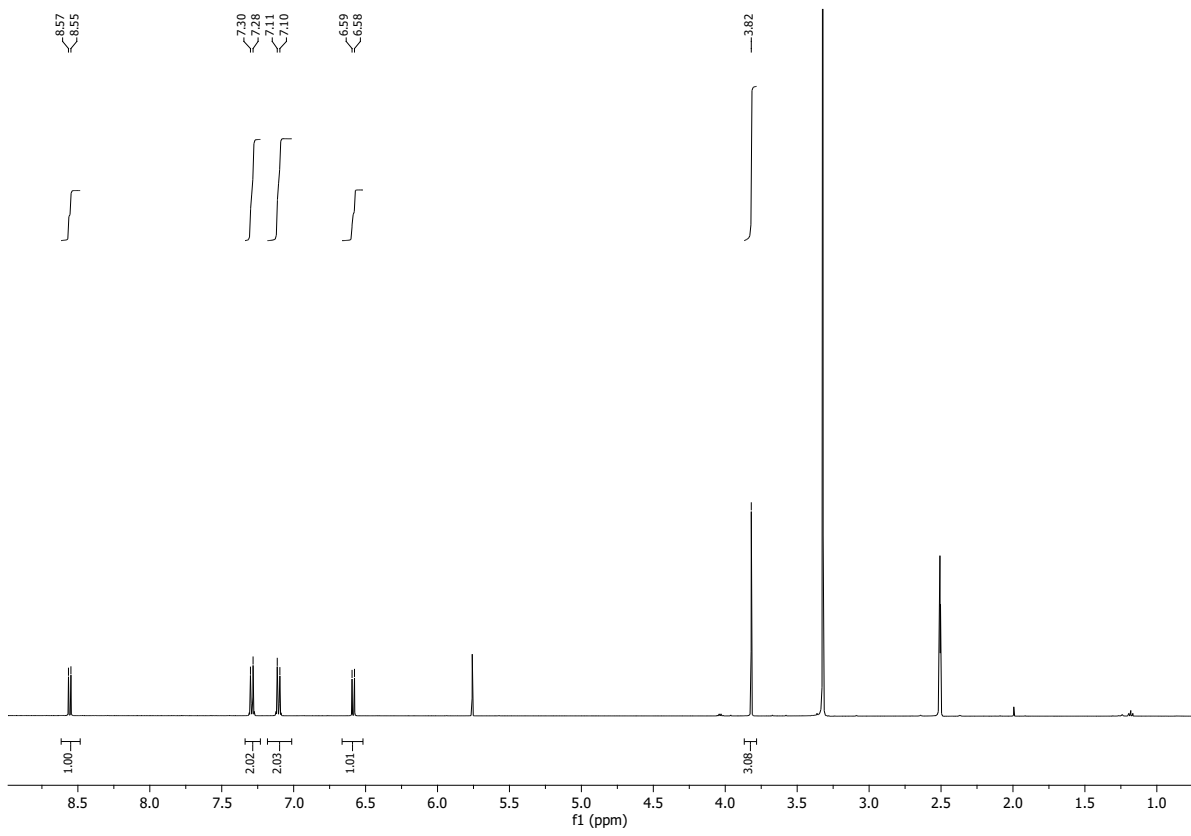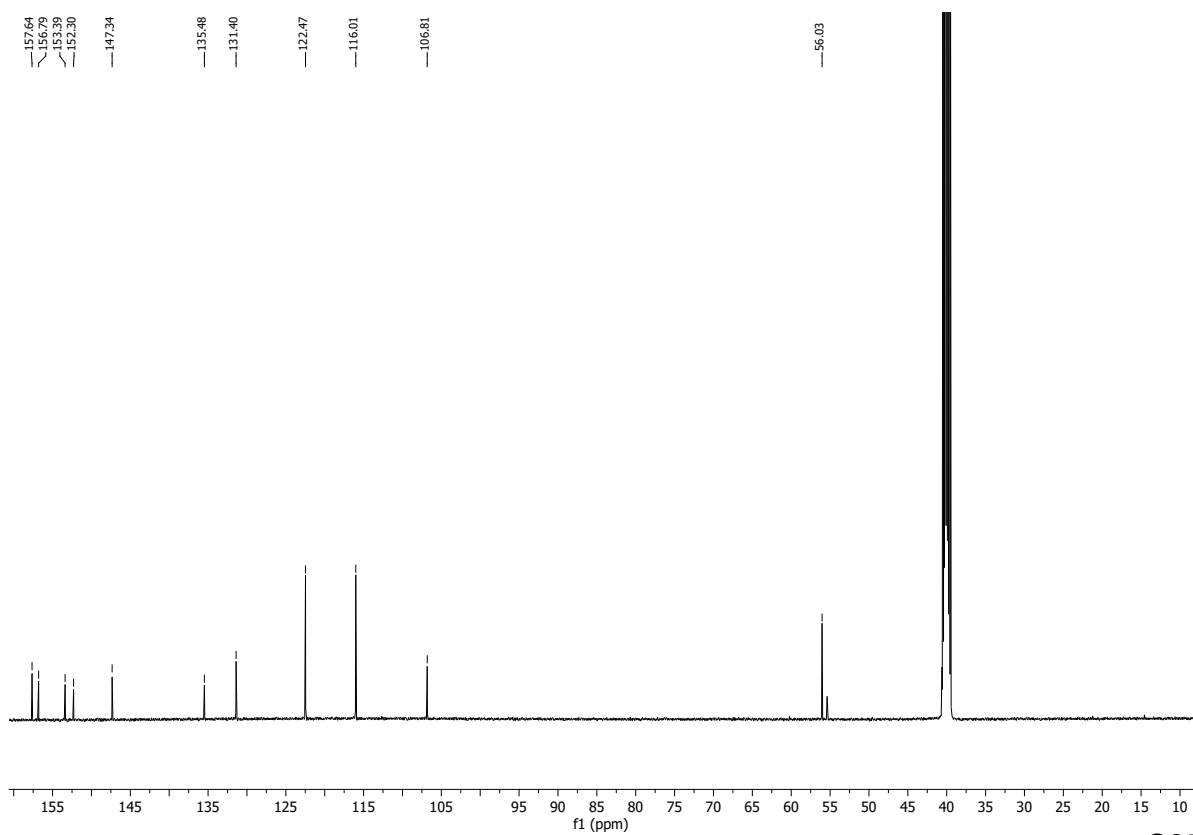

# Compound 8

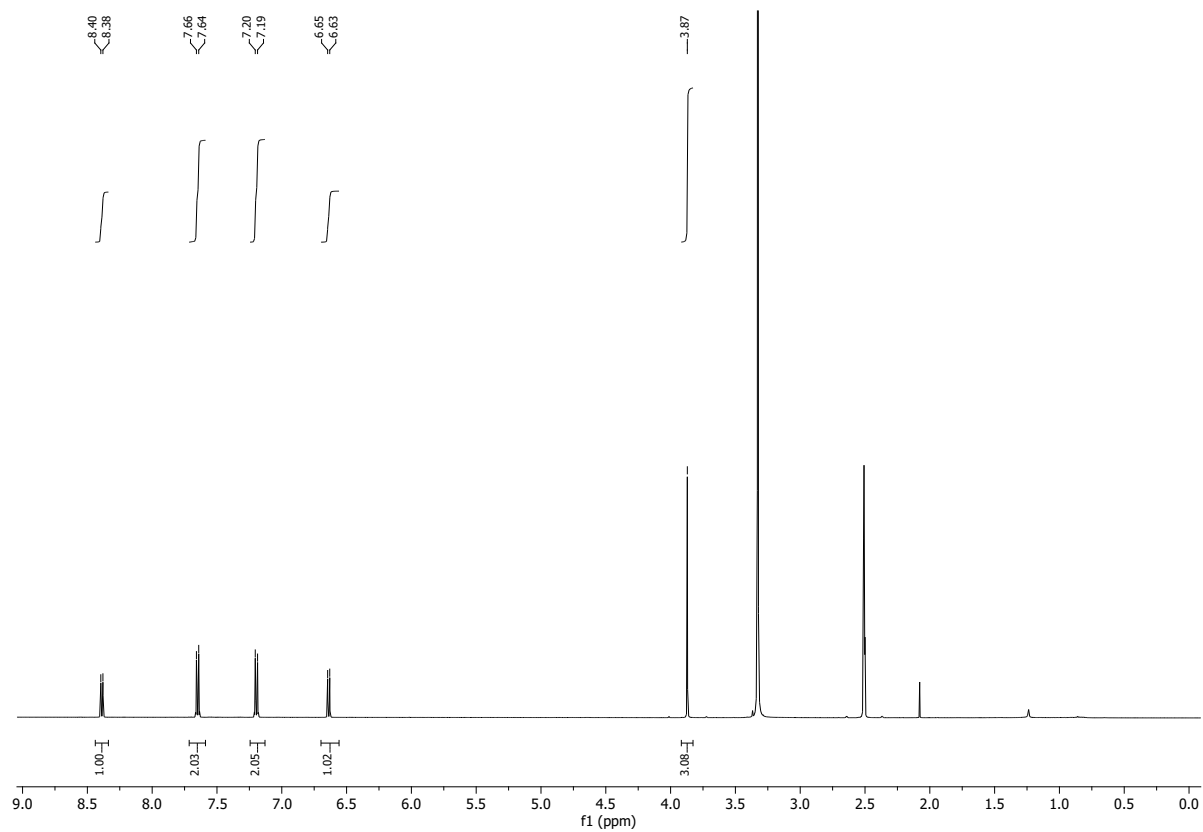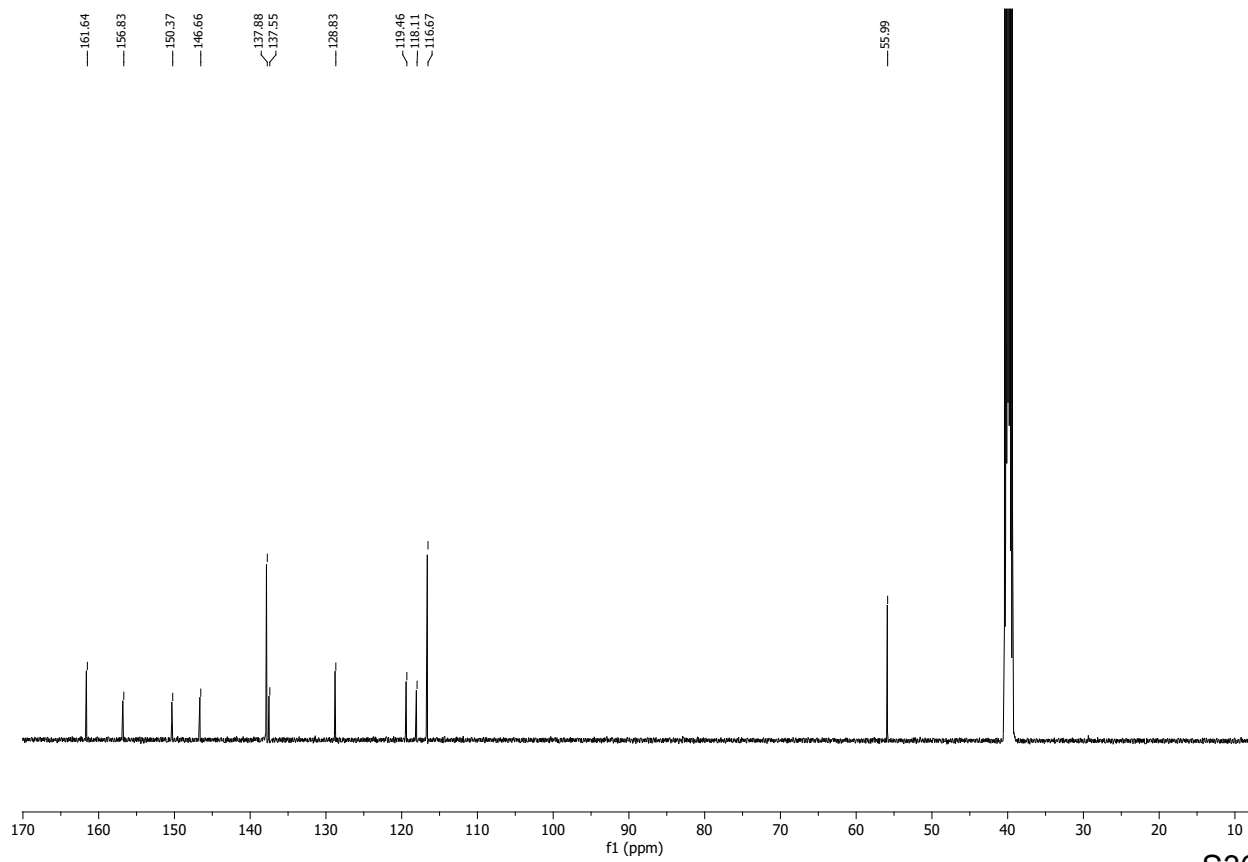

Compound 9

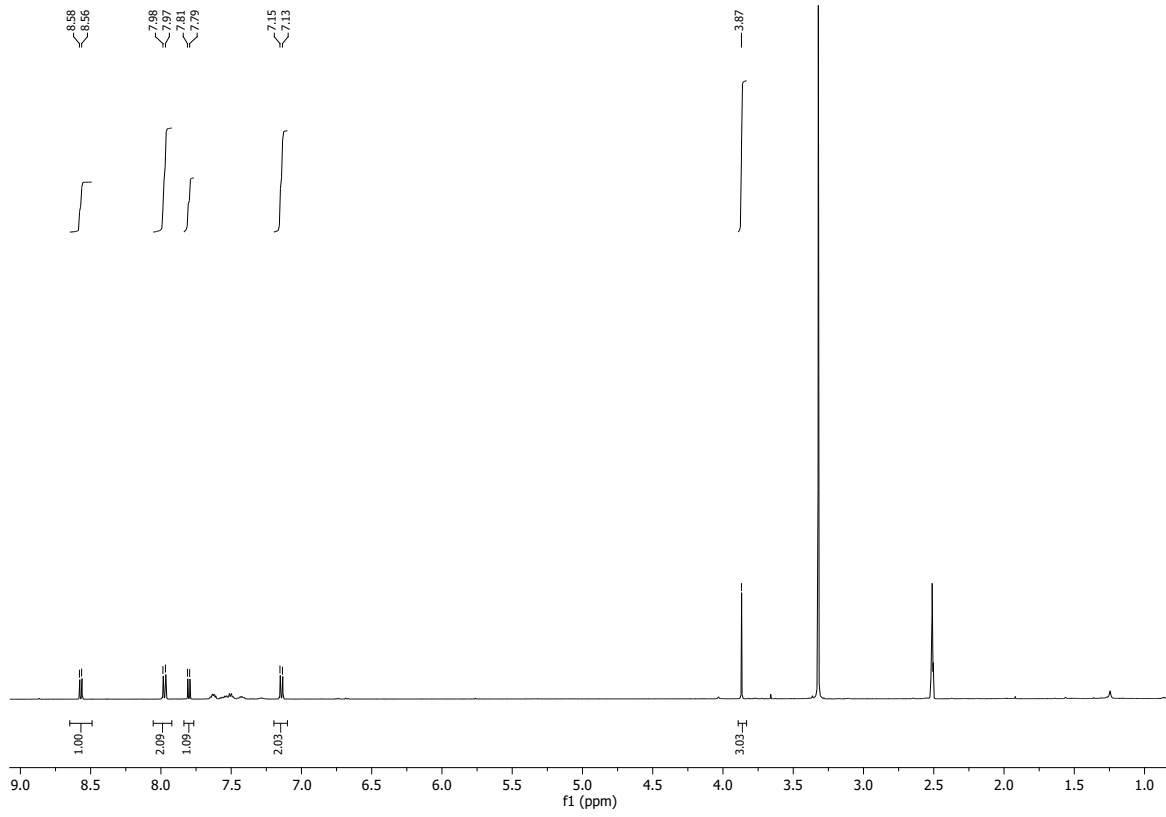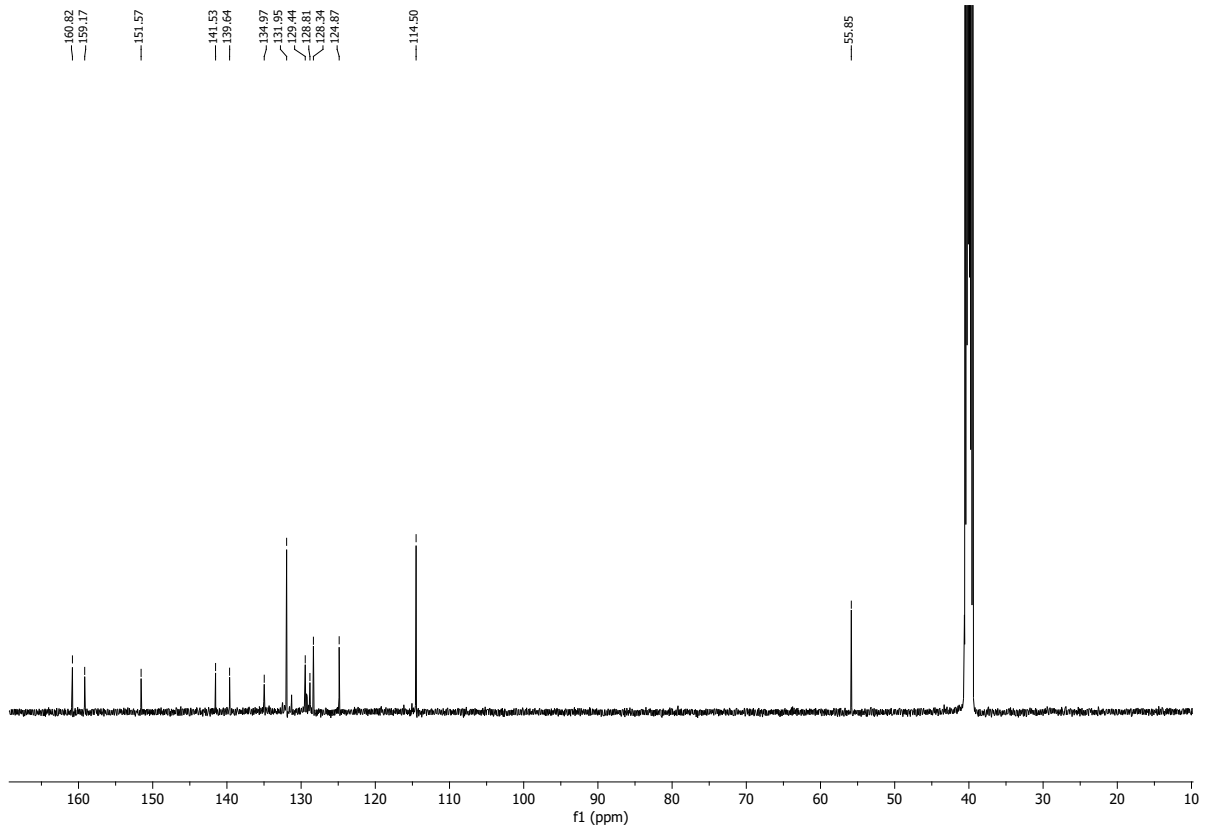

Compound **11** (~65% purity with remaining non-nitrated intermediate)

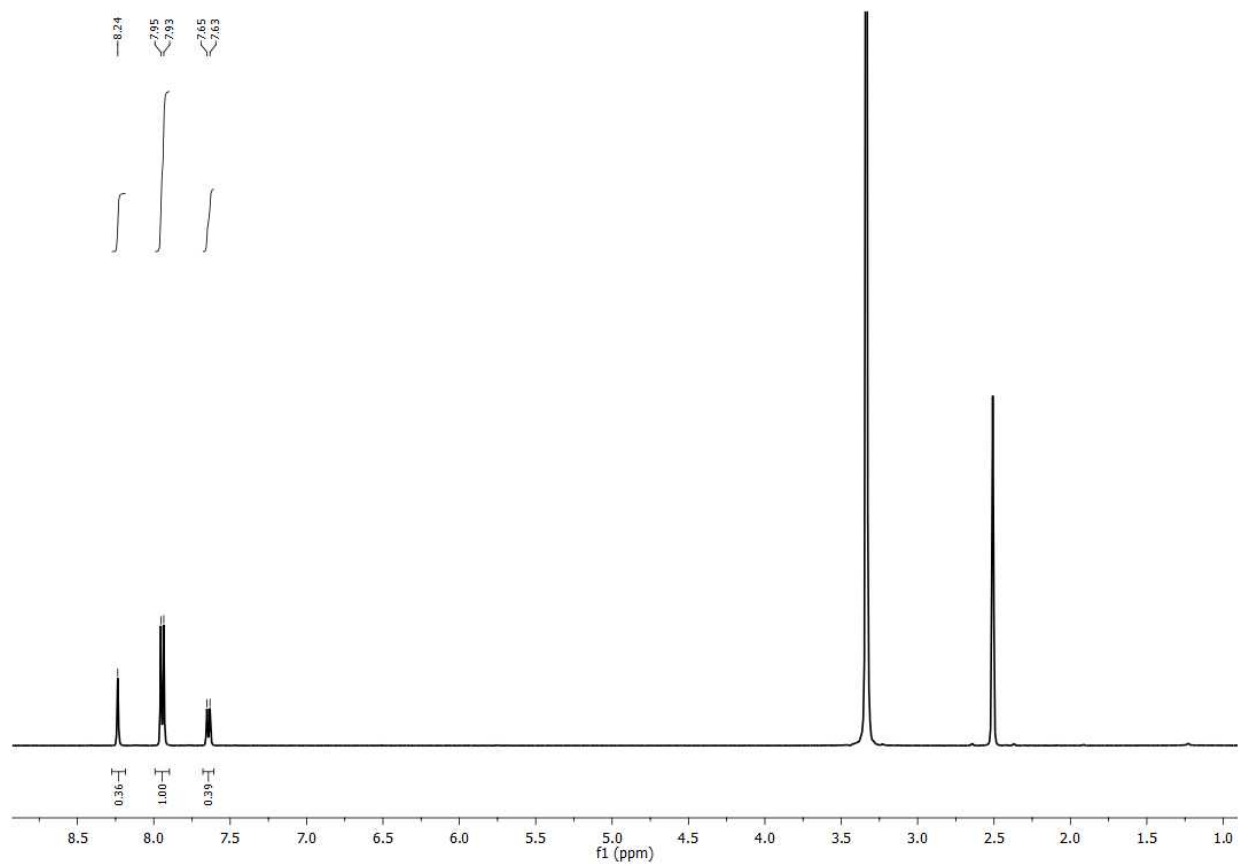

# Compound 11a

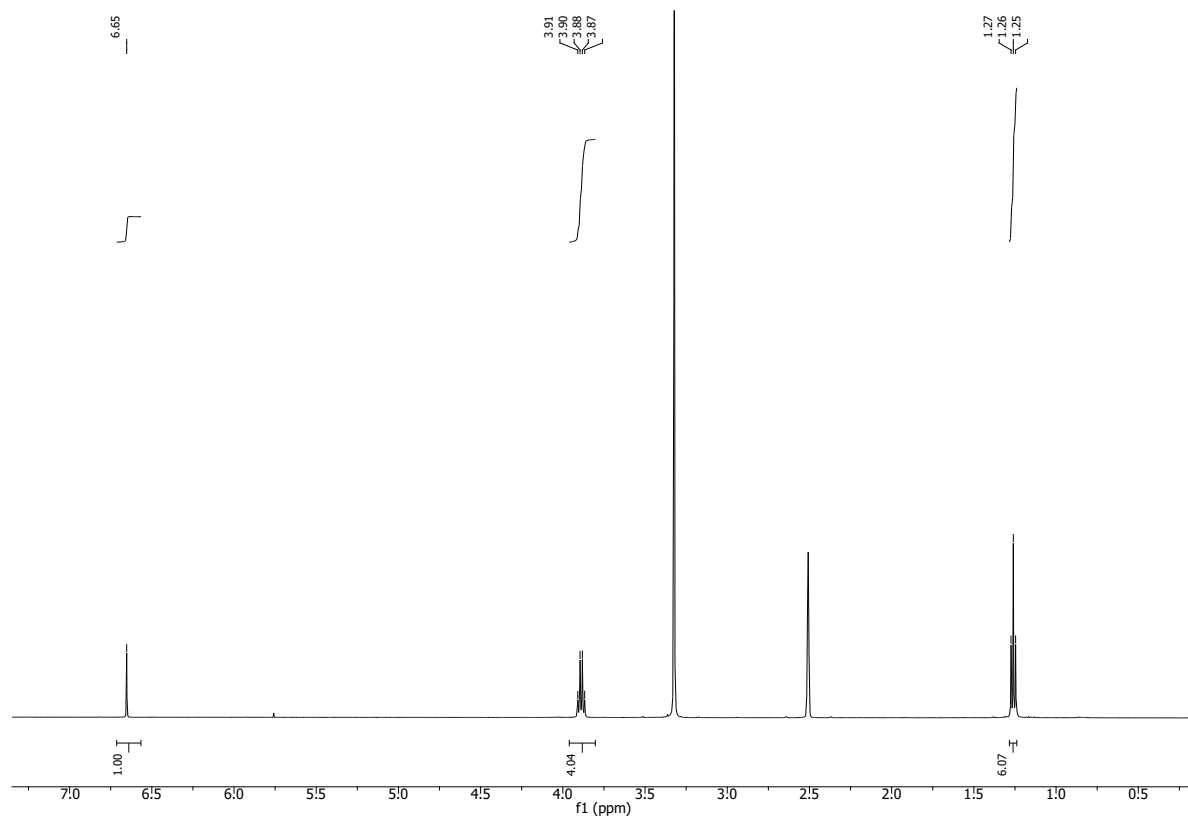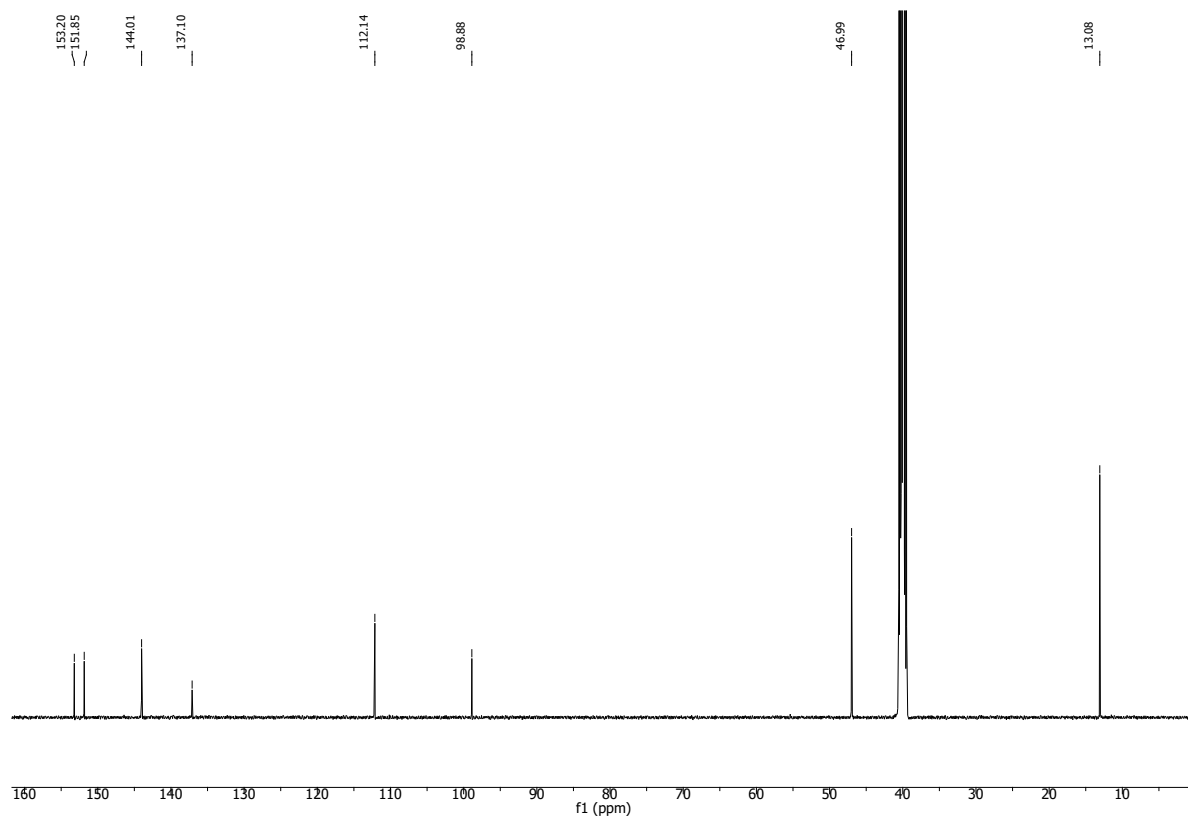

# Compound 12

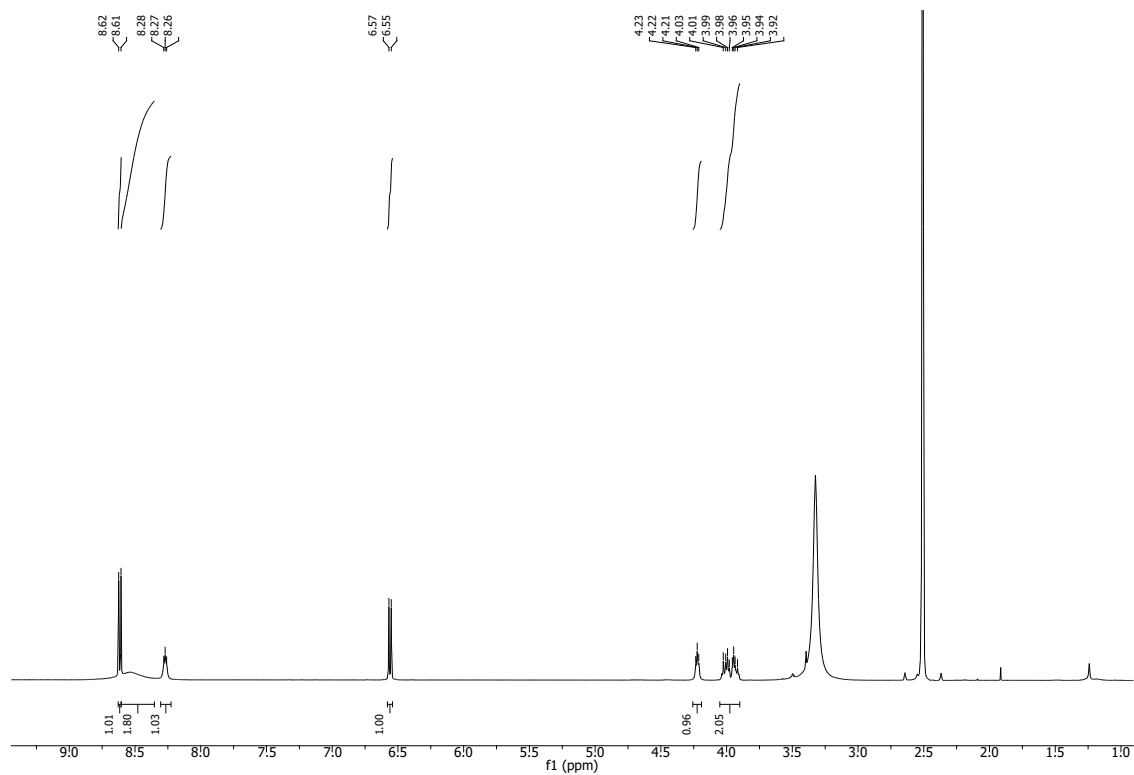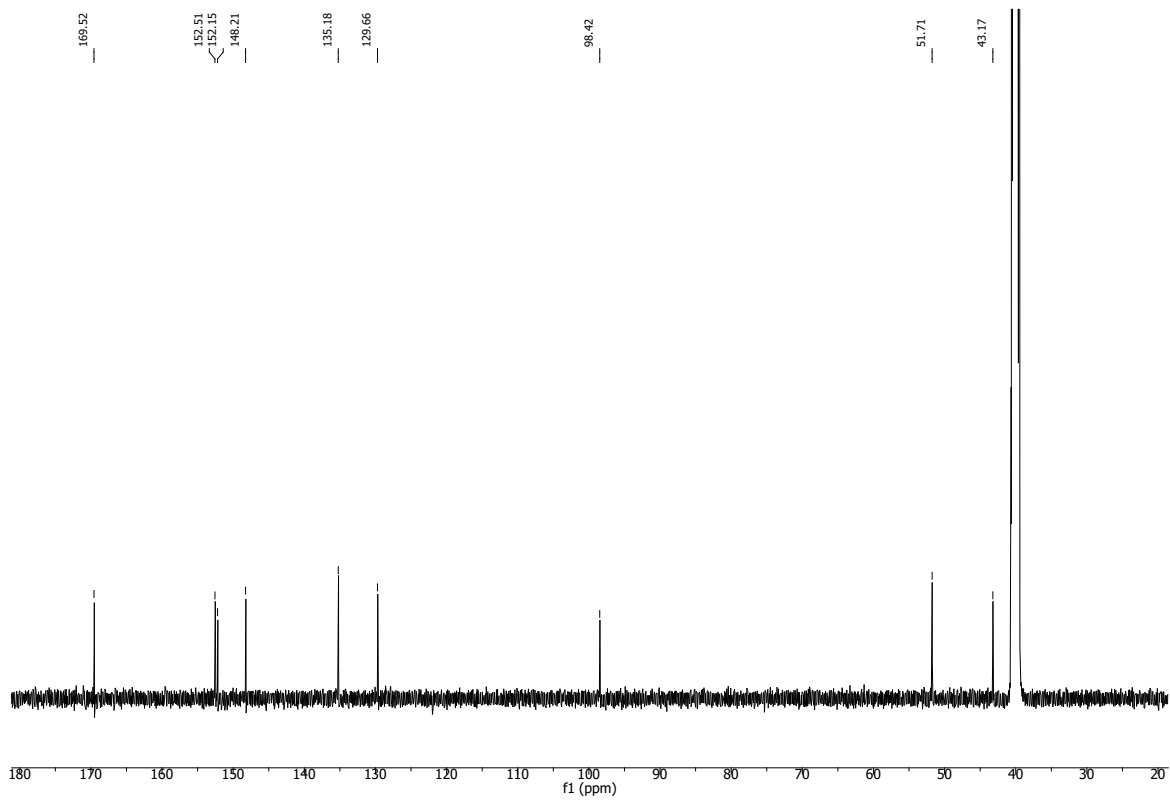



Compound 13

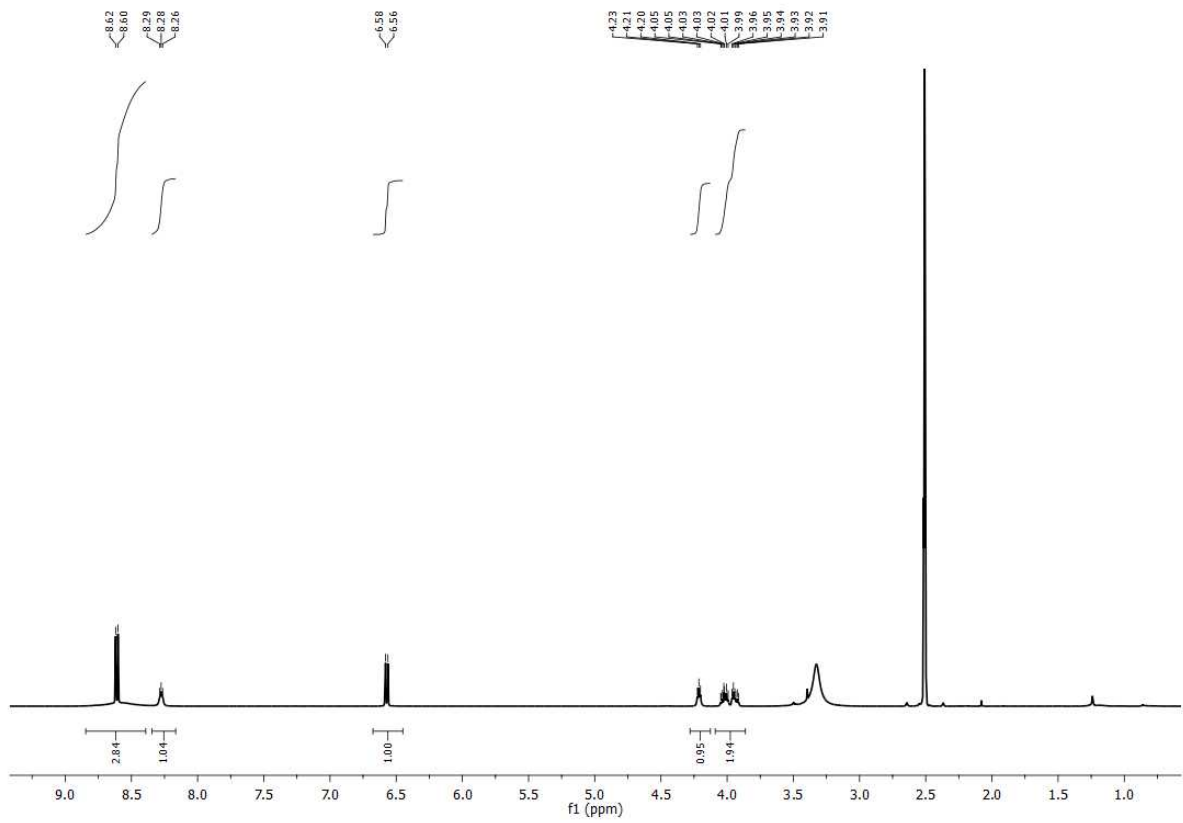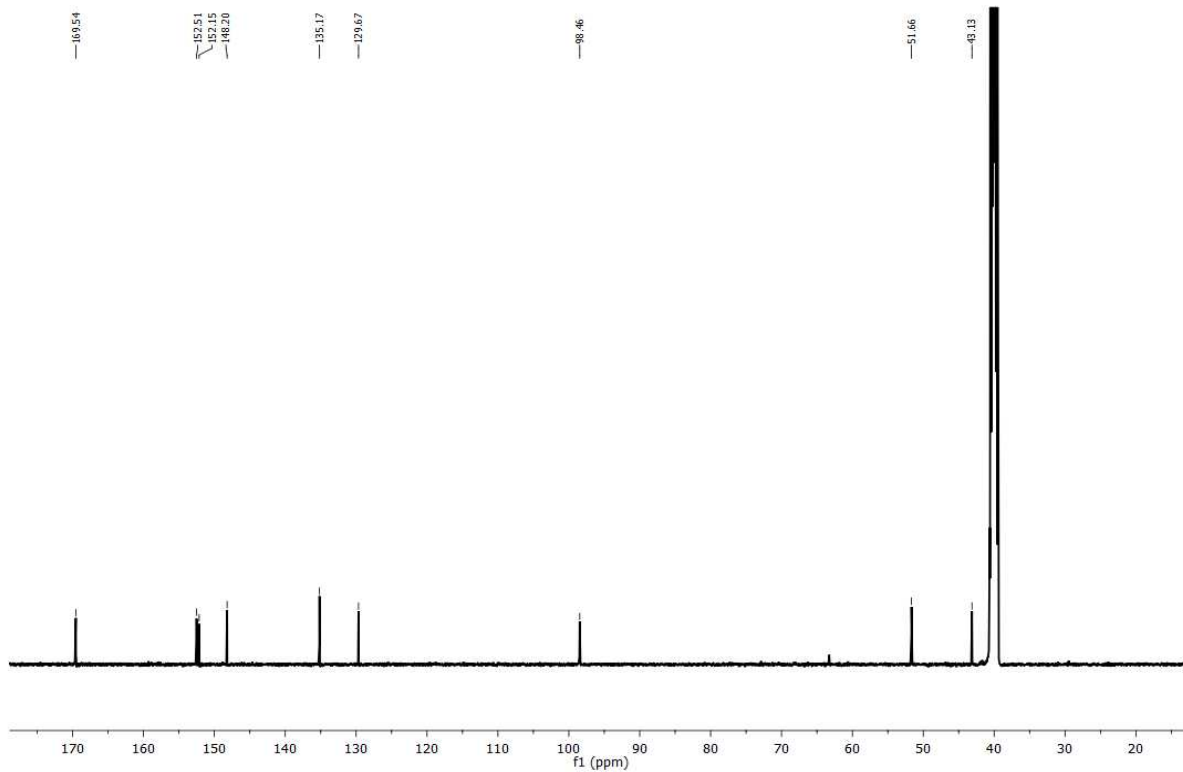

# Compound 14

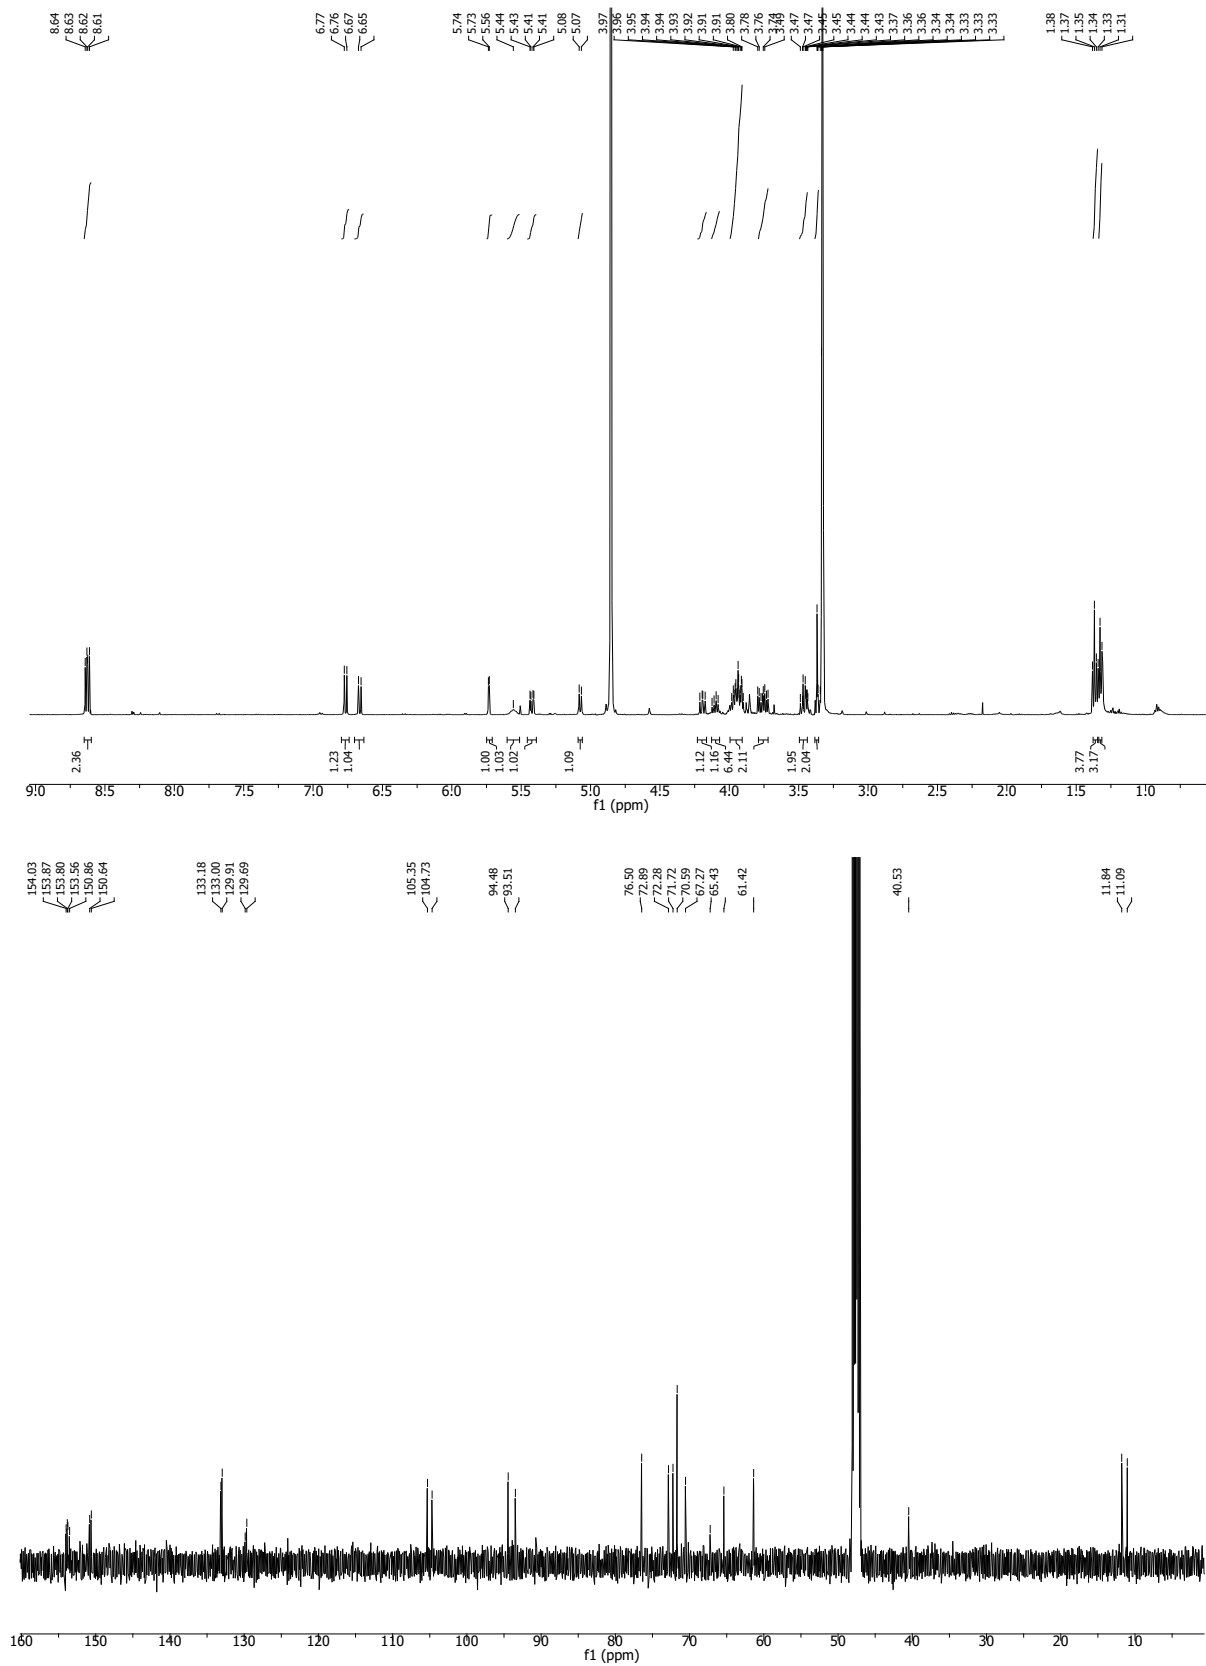

# Compound 15

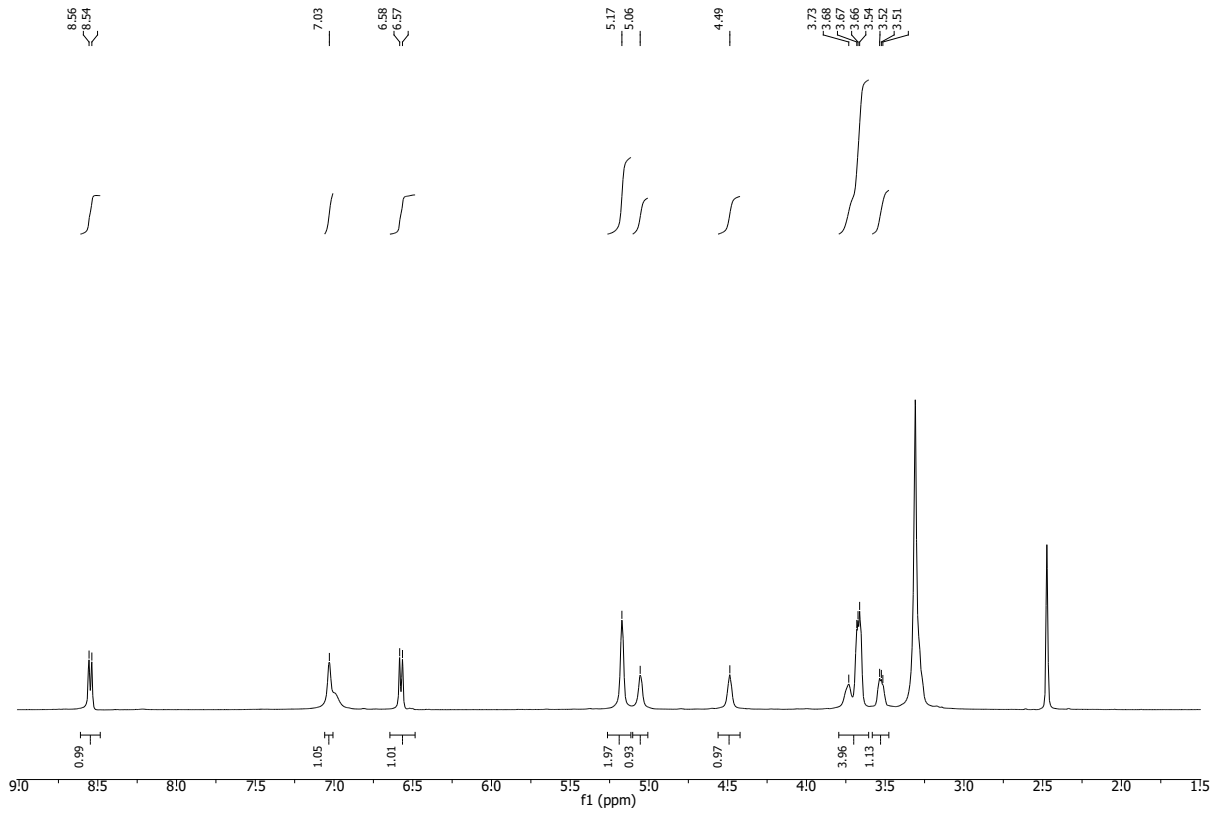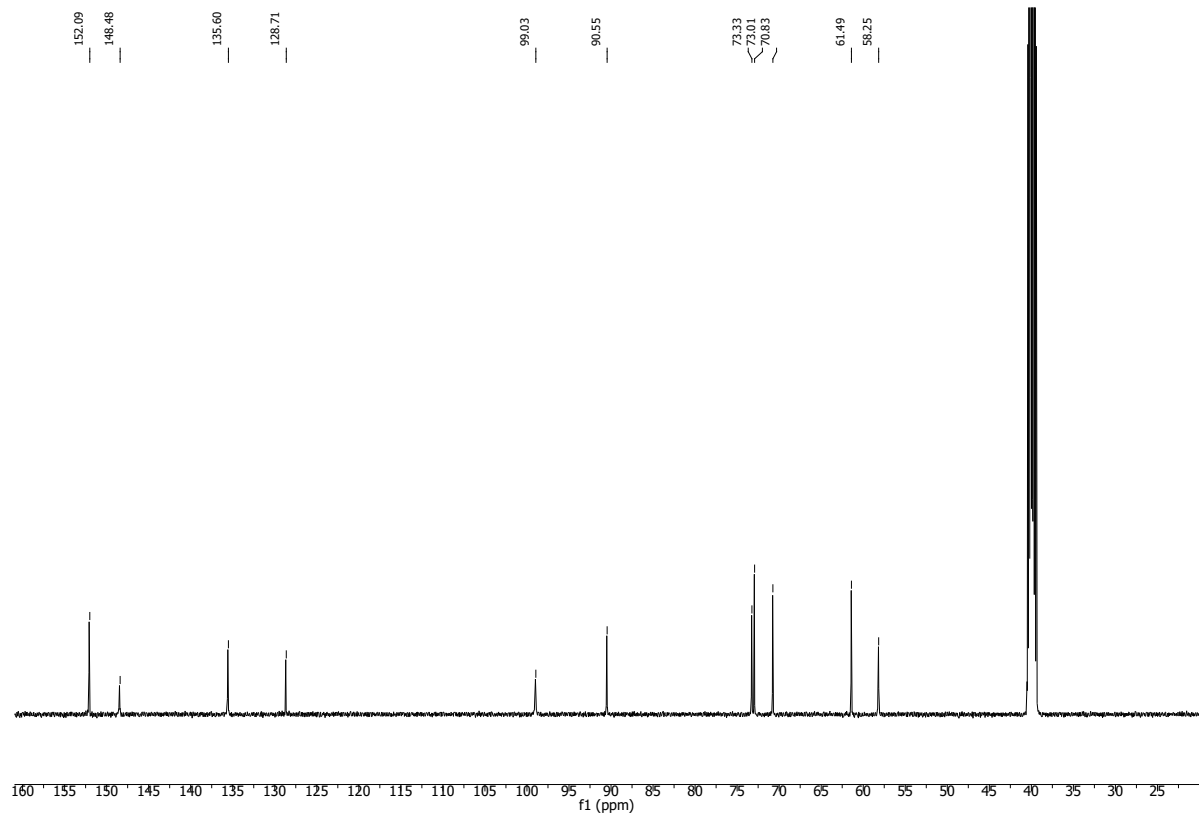

# Compound 16

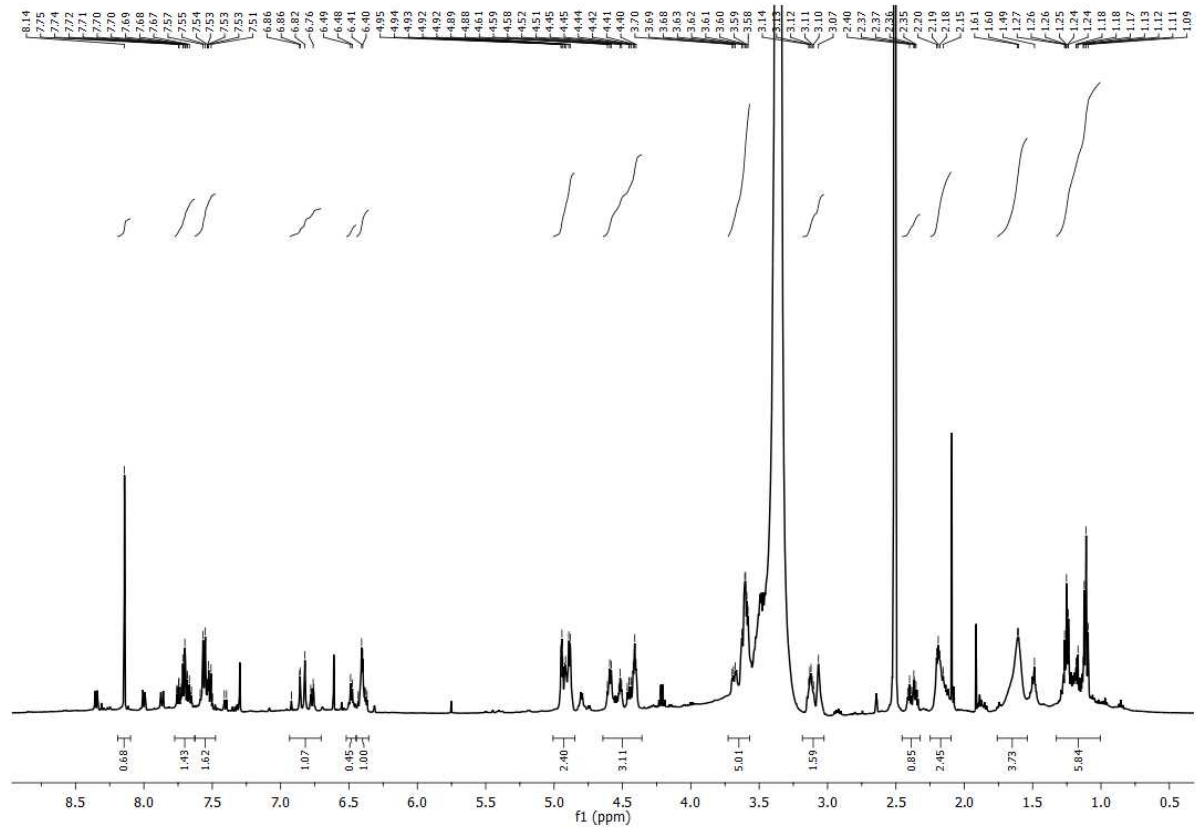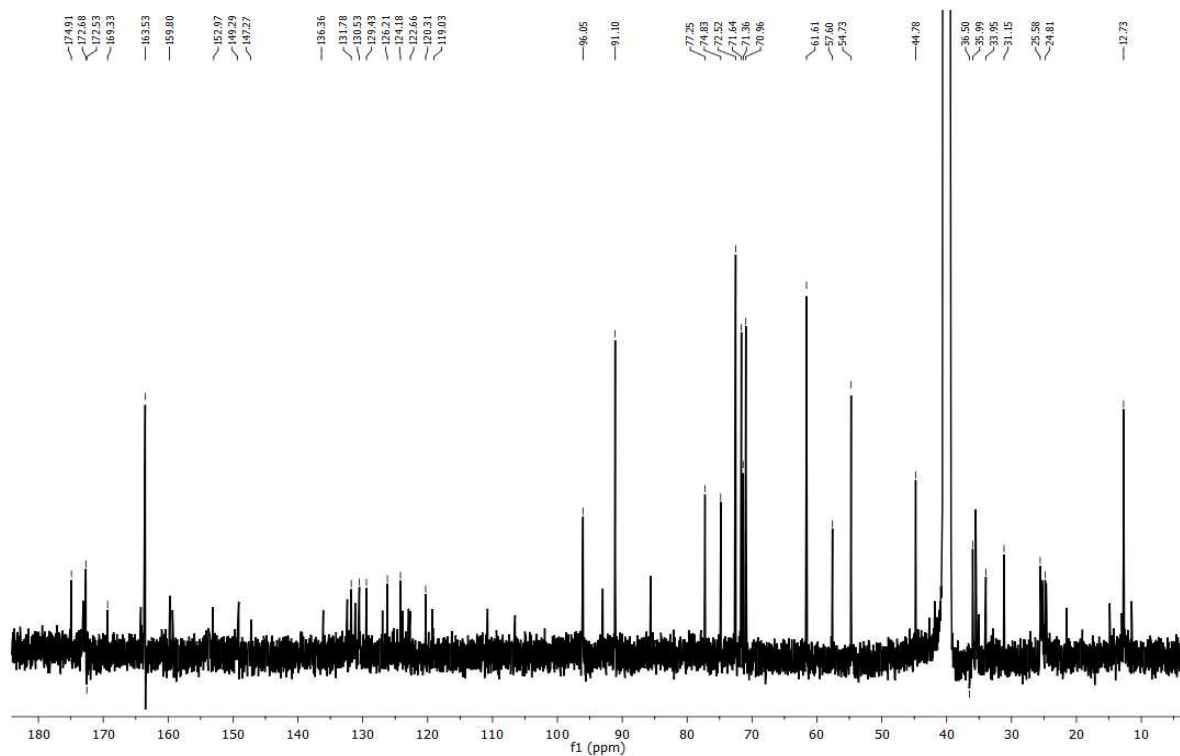

Compound **pre-17**

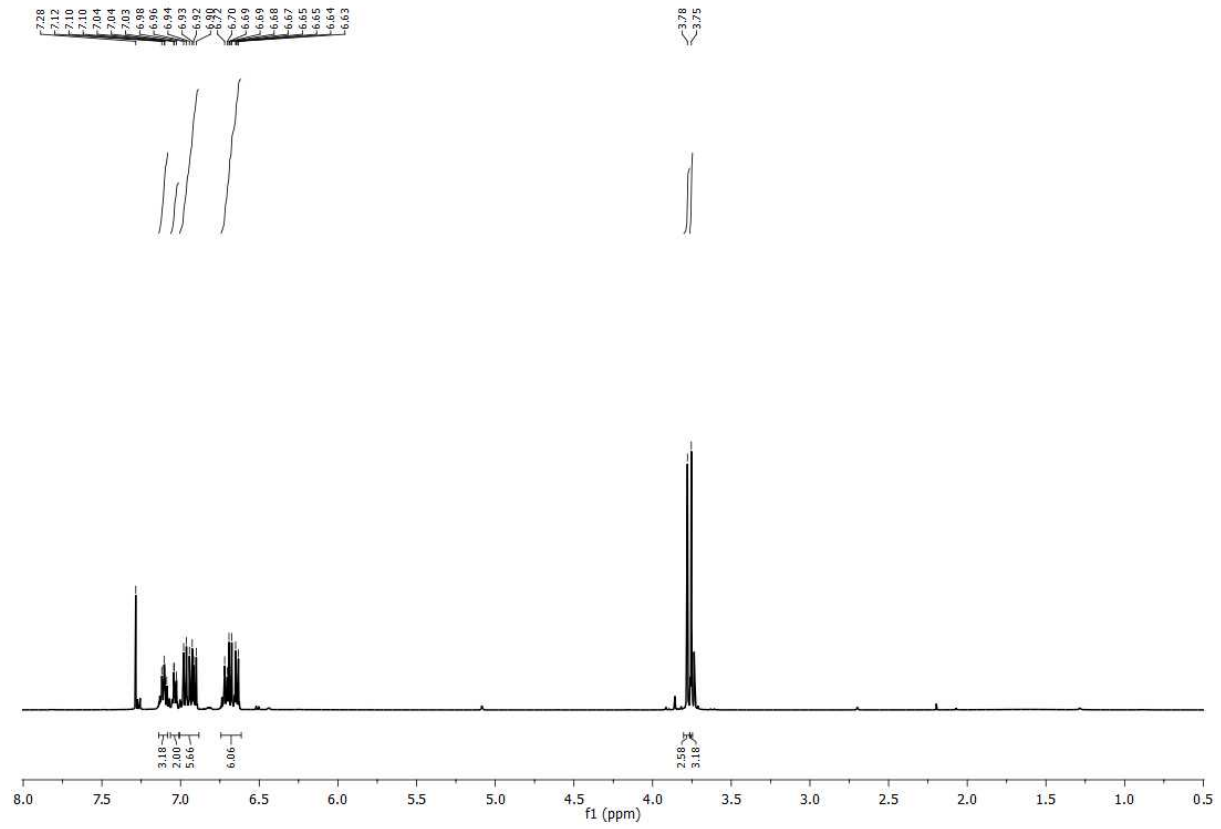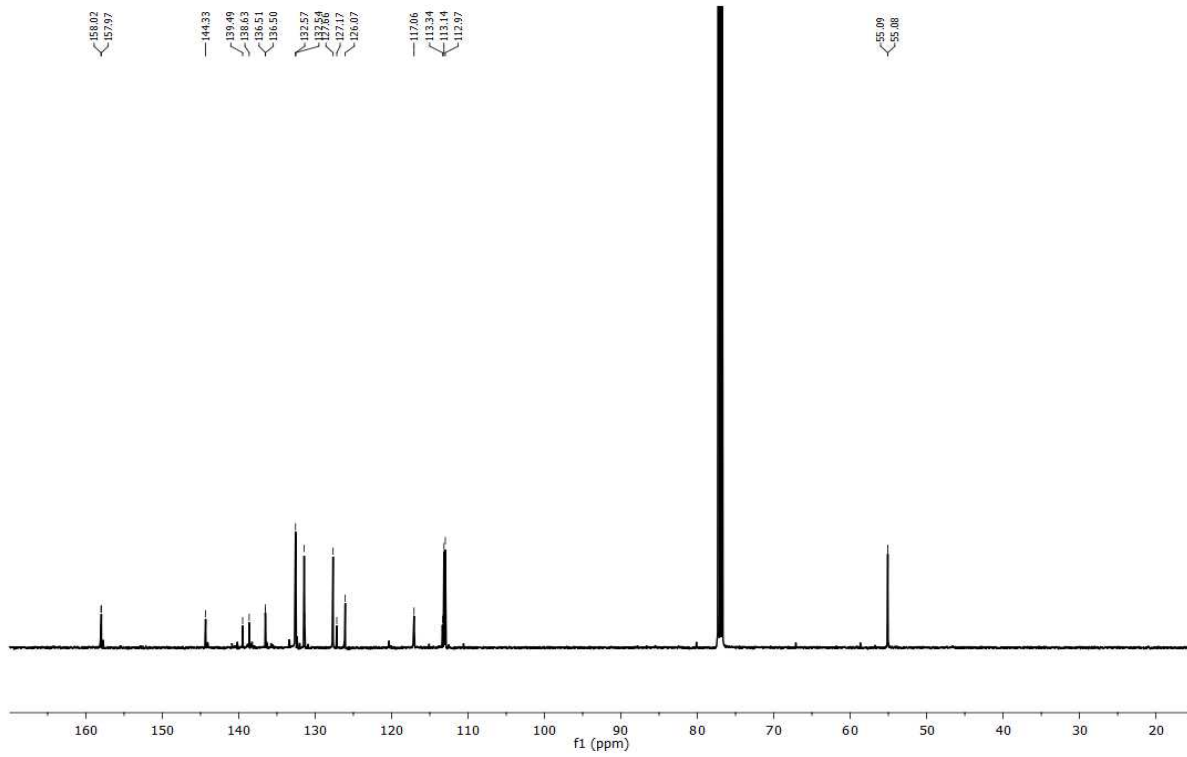

# Compound 17

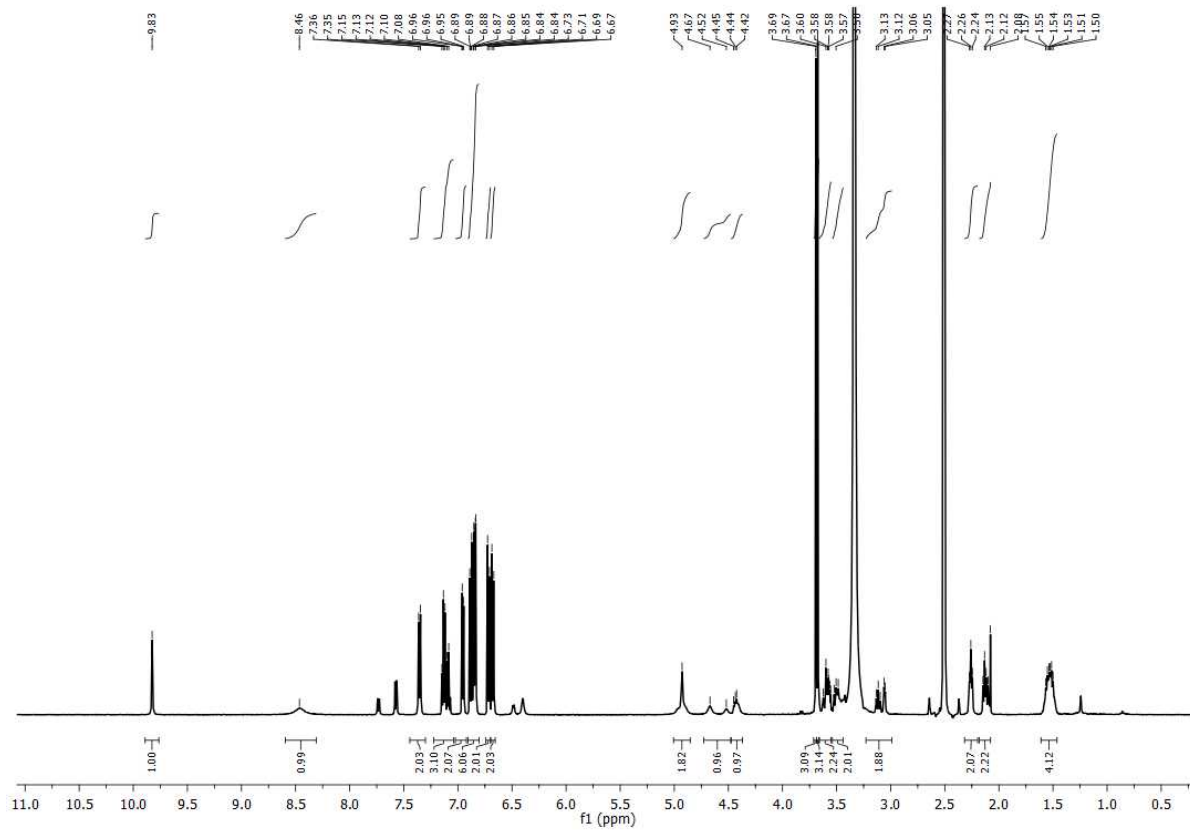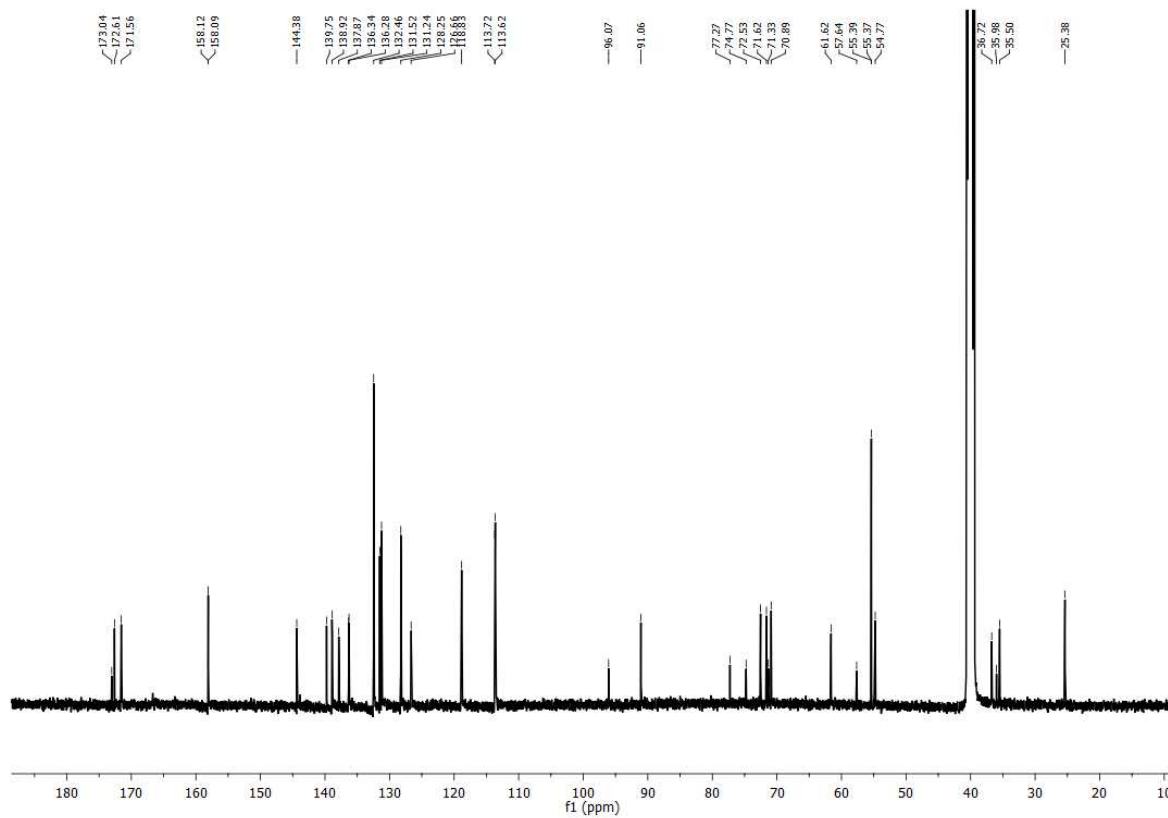

## HPLC traces

### Compound 14

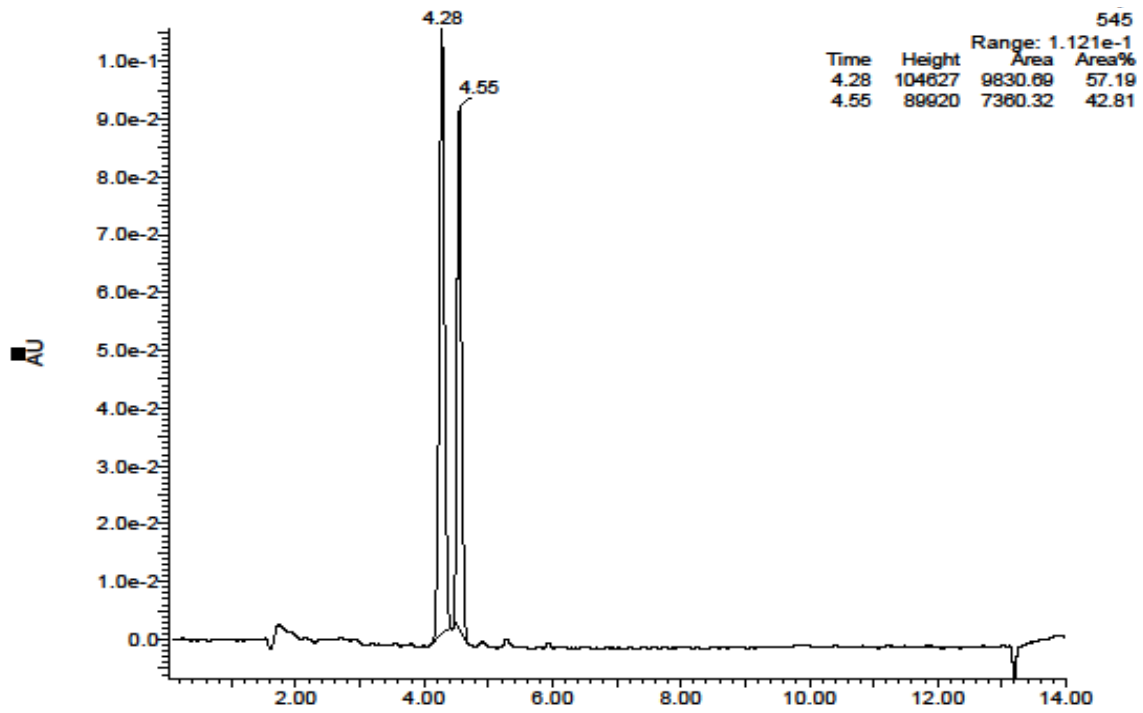

### Compound 15

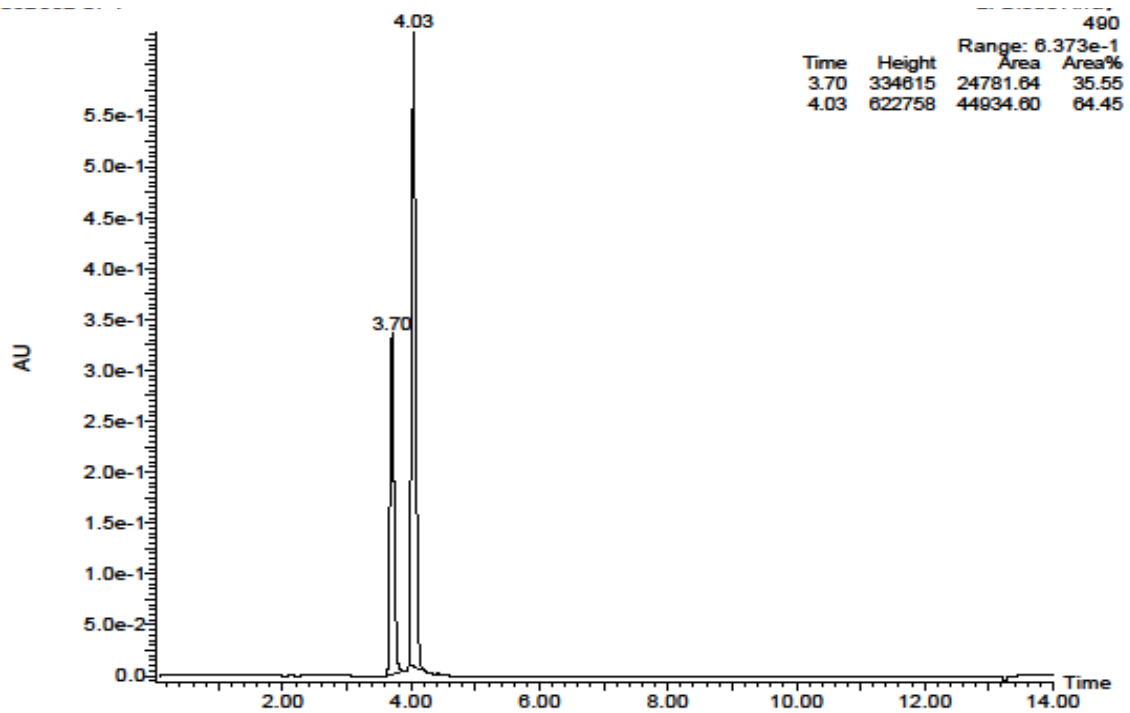

## Supplementary References

1. Kuru, E. et al. In situ probing of newly synthesized peptidoglycan in live bacteria with fluorescent D-amino acids. *Angew. Chem. Int. Ed.* **51**, 12519–12523 (2012).
2. Redmond, R. & Gamblin, J. N. A compilation of singlet oxygen yields from biologically relevant molecules. *Photochem. Photobiol.* **70**, 391–475 (1999).
3. Zhang Y. H. et al. AIE based GSH activatable photosensitizer for imaging-guided photodynamic therapy. *Chem. Commun.* **56**, 10317–10320 (2020).
4. Benson, S. et al. SCOTfluors: Small, conjugatable, orthogonal and tunable fluorophores for in vivo imaging of cell metabolism. *Angew. Chem. Int. Ed.* **58**, 6911–6915 (2019).
5. Liberek, B. et al. *N*-alkyl derivatives of 2-amino-2-deoxy-D-glucose. *Carbohydr. Res.* **340**, 1876–1884 (2005).
6. Zhang, S. et al. A maleimide-functionalized tetraphenylethene for measuring and imaging unfolded proteins in cells. *Chem. Asian J.* **14**, 904–909 (2019).
