# Supplementary material for: Photoactivatable metabolic warheads enable precise and safe ablation of target cells in vivo
Source: PubMed Central journal article supplement (PMC8062536; doi:10.1038/s41467-021-22578-2), 2021-04-22
Supplement: 41467_2021_22578_MOESM3_ESM.pdf [file 41467_2021_22578_MOESM3_ESM.pdf]

## Description of Additional Supplementary Files

File Name: Supplementary Movie 1

Description: **Recording of swimming motion of a representative untreated 3 dpf zebrafish larva.** Larvae were placed in a 10-cm Petri dish filled with Danieau's solution. The steady-state swimming behavior was recorded using a SONY ExwaveHAD camera and EthoVision XT 7.0 software was used to analyze the recording and generate the tracking data.

File Name: Supplementary Movie 2

Description: **Recording of swimming motion of a representative 3 dpf zebrafish larva after treatment with compound 15 and light irradiation.** Larvae were placed in a 10-cm Petri dish filled with Danieau's solution. The steady-state swimming behavior was recorded using a SONY ExwaveHAD camera and EthoVision XT 7.0 software was used to analyze the recording and generate the tracking data.

File Name: Supplementary Movie 3

Description: **Heartbeat monitoring of a representative untreated 3 dpf zebrafish larva.** Larvae were anesthetized with MS222 and mounted sideways in 3% methylcellulose for continuous heartbeat recording using a Hamamatsu camera (40 frames per second) and HClmage 4.2.0.33 software.

File Name: Supplementary Movie 4

Description: **Heartbeat monitoring of a representative 3 dpf zebrafish larva after treatment with compound 15 and light irradiation.** Larvae were anesthetized with MS222 and mounted sideways in 3% methylcellulose for continuous heartbeat recording using a Hamamatsu camera (40 frames per second) and HClmage 4.2.0.33 software.
